# **An ancestral dual function of OmpM as outer membrane tether and nutrient uptake channel in diderm Firmicutes**

Augustinas Silale<sup>1</sup>, Yiling Zhu<sup>1</sup>, Jerzy Witwinowski<sup>2</sup>, Robert E. Smith<sup>2</sup>, Kahlan E. Newman<sup>3</sup>, Satya P. Bhamidimarri<sup>1</sup>, Arnaud Baslé<sup>1</sup>, Syma Khalid<sup>4</sup>, Christophe Beloin<sup>5</sup>, Simonetta Gribaldo<sup>2</sup>, Bert van den Berg<sup>1\*</sup>

<sup>1</sup> Biosciences Institute, Faculty of Medical Sciences, Newcastle University, Framlington Place, NE2 4HH, Newcastle upon Tyne, UK

<sup>2</sup> Institut Pasteur, Université de Paris Cité, UMR CNRS 6047, Unit Evolutionary Biology of the Microbial Cell, Paris, France

<sup>3</sup> School of Chemistry, University of Southampton, Southampton, SO17 1BJ, UK

<sup>4</sup> Department of Biochemistry, University of Oxford, Oxford, OX1 3QU, UK

<sup>5</sup> Institut Pasteur, Université de Paris Cité, UMR CNRS 6047, Genetics of Biofilms Laboratory, Paris, France

\* Correspondence to: [bert.van-den-berg@newcastle.ac.uk](mailto:bert.van-den-berg@newcastle.ac.uk), [simonetta.gribaldo@pasteur.fr](mailto:simonetta.gribaldo@pasteur.fr), [christophe.beloin@pasteur.fr](mailto:christophe.beloin@pasteur.fr)

## 26 **Abstract**

27 The outer membrane (OM) in diderm, or Gram-negative, bacteria must be tethered to  
28 peptidoglycan (PG) for mechanical stability and to maintain cell morphology. Most  
29 diderm phyla from the Terrabacteria group lack well-characterised OM attachment  
30 systems such as Braun's lipoprotein, Pal and OmpA, but instead have the OmpM  
31 protein. OmpM has a periplasmic region containing an S-layer homology domain and  
32 a  $\beta$ -barrel region that is embedded in the OM. Here, we have determined the structure  
33 of the most abundant OmpM protein from the diderm firmicute *Veillonella parvula* by  
34 single particle cryogenic electron microscopy (cryo-EM). We reveal an OM portion  
35 similar to well-characterised trimeric general porins and a mobile periplasmic PG-  
36 binding region. Combining the cryo-EM data with crystal structures, structure  
37 predictions and molecular dynamics simulations, we show that the periplasmic region  
38 of OmpM likely adopts multiple conformations. Single-channel electrophysiology  
39 demonstrates ion conductance properties similar to *E. coli* OmpF. Finally, we  
40 demonstrate via functional assays that the four OmpM paralogues are likely to be the  
41 only general porins in *V. parvula*. Together, our results show that OM tethering and  
42 nutrient acquisition are genetically linked in *V. parvula* (and other diderm Firmicutes),  
43 suggesting that concurrent loss of two key OM-related functions, tethering and nutrient  
44 uptake, promoted the multiple OM loss events that have been inferred in the  
45 Terrabacteria.

46

## 47 **Introduction**

48 The defining feature of diderm, or Gram-negative, bacteria is the presence of an  
49 additional, outer membrane (OM)<sup>1,2</sup>. This complex cell envelope component is an  
50 asymmetric lipid bilayer, usually containing lipopolysaccharide (LPS) in the outer  
51 leaflet and phospholipids in the inner leaflet. The existence of an OM was first  
52 demonstrated by electron microscopy analysis of the cell envelope of the diderm  
53 Firmicute *Veillonella parvula*<sup>3</sup>. However, most of our knowledge about the OM derives  
54 from studies of Proteobacteria, especially *Escherichia coli*. While the OM provides  
55 mechanical stabilisation to the cell<sup>4</sup>, diderm bacteria must tether the OM to  
56 peptidoglycan (PG) for additional mechanical stability and to maintain cell morphology.  
57 *E. coli* has three OM tethering systems: Braun's lipoprotein (Lpp) that covalently links  
58 the PG with the OM<sup>5,6</sup>, the lipoprotein Pal and the OM protein OmpA which associate  
59 with PG non-covalently<sup>7-11</sup>. Mutants of these systems exhibit cell envelope defects  
60 and increased susceptibility to cell envelope stressors, such as detergents<sup>7,12-15</sup>.

61

62 Recent phylogenetic analysis of the distribution of OM attachment systems throughout  
63 the bacterial tree of life has highlighted that the systems found in *E. coli* present a  
64 striking bimodal distribution across the two major clades in which Bacteria are divided,  
65 the Terrabacteria (including both monoderm and diderm phyla such as the Firmicutes  
66 and the Cyanobacteria, respectively) and the Gracilicutes (including only diderm phyla  
67 such as Proteobacteria and Bacteroidetes)<sup>16</sup>. Braun's lipoprotein is only present in a  
68 subset of Proteobacteria, and Pal is only present in Gracilicutes, together with the  
69 lipoprotein export (Lol) machinery. OmpA is also largely absent in many diderms.  
70 Strikingly, the OmpM protein is a fourth OM tethering system that is widespread in  
71 diderm Terrabacteria, but is completely absent in the Gracilicutes. OmpM consists of  
72 an N-terminal periplasmic S-layer homology (SLH) domain connected via a linker

73 region to a C-terminal OM  $\beta$ -barrel<sup>17–20</sup>. The SLH domain is expected to bind  
74 pyruvylated secondary cell wall polymers (SCWPs)<sup>16,21–23</sup>, whereas *V. parvula* (and  
75 other members of the Negativicutes) anchor their OM to PG modified with polyamines  
76 (e.g. cadaverine and putrescine) on the D-glutamate of the peptide stem<sup>18,24,25</sup>. It is  
77 unclear why the Negativicutes apparently use a different ligand for OM anchoring, or  
78 whether the mechanism of attachment by OmpM is substantially different in this group.  
79 In both cases, the atomic details of PG binding to OmpM SLH domains are unclear.

80

81 Deletion of three out of the four OmpM paralogues in *V. parvula* resulted in a dramatic  
82 phenotype where the OM detaches, the periplasmic space is greatly enlarged and  
83 multiple cells share a single OM<sup>16</sup>. Complementation by the most abundant *V. parvula*  
84 OmpM paralogue, OmpM1, reverted this phenotype back to wild type. These data led  
85 to the proposal that OmpM proteins represent an ancestral OM tethering system in  
86 Terrabacteria and perhaps the last bacterial common ancestor, and might have been  
87 involved in multiple OM-loss events via OmpM mutations weakening (and eventually  
88 abolishing) the SLH-PG interactions.

89

90 Due to its LPS component, the OM presents a permeability barrier for hydrophilic and  
91 hydrophobic small molecules, both detrimental (e.g. antibiotics) and essential (e.g.  
92 nutrients)<sup>26,27</sup>. Controlled permeability of the OM is established by OM proteins, which  
93 either mediate energized transport of specific nutrients in the case of TonB-dependent  
94 transporters, or allow size-limited (<~600 Da) diffusion in the case of porins<sup>26,27</sup>. Porins  
95 are well-characterised in many Proteobacteria, but much less information is available  
96 on small-molecule permeation in diderm Terrabacteria. Earlier work on the OmpM  
97 orthologue Mep45 from the Negativicute *Selenomonas ruminantium* suggests that it  
98 can transport nutrients via its  $\beta$ -barrel domain<sup>19</sup>, but another study on cyanobacterial

99 OM permeability suggests that its OmpM orthologues form a channel too small for  
100 most simple nutrients<sup>20</sup>. The role of OmpM in nutrient acquisition in *V. parvula* is  
101 unclear. In addition to the four OmpM paralogues, there are two other putative porin  
102 genes in the *V. parvula* genome: an OmpA-like homologue (*FNLLGLLA\_00518*) and  
103 a sixth porin (*FNLLGLLA\_00833*)<sup>28</sup>. Proteomic analysis of the *V. parvula* OM showed  
104 that OmpM1, OmpM2 and *FNLLGLLA\_00833* are, respectively, the first, third, and  
105 sixth most abundant OM proteins<sup>28</sup>, suggesting that these proteins could play major  
106 roles in determining OM permeability.

107

108 A recent analysis has suggested that the barrels of most OmpM-like proteins have 16-  
109 30  $\beta$ -strands<sup>29</sup>, and could therefore form pores that are large enough for small  
110 molecule diffusion across the OM, a hypothesis supported by electrophysiology  
111 experiments with the diderm Terrabacterium *Deinococcus radiodurans* SlpA protein<sup>30</sup>  
112 and liposome swelling studies on Mep45 from *S. ruminantium*<sup>19</sup>. The recently  
113 determined structures of SlpA reveal that it forms a very large trimeric complex  
114 composed of 30-stranded  $\beta$ -barrels, *i.e.* much larger than those of the general *E. coli*  
115 porins OmpC and OmpF<sup>29,30</sup>. In any case, it is unclear how generalisable the findings  
116 are from SlpA of *D. radiodurans*, which has an unusually complex cell envelope with  
117 an S-layer<sup>31-33</sup>, to OmpM proteins in other diderm Terrabacteria, especially in  
118 Negativicutes which tether the OM to polyaminated PG rather than pyruvylated  
119 SCWP.

120

121 Here we use single particle cryo-EM, X-ray crystallography, molecular dynamics  
122 simulations, bioinformatic analyses and functional assays to show that OmpM1 from  
123 *V. parvula* (VpOmpM1) is a general porin with similar structural and functional  
124 properties to *E. coli* OmpF, and an additional mobile periplasmic region that can take

125 on different folds. We also show that the four OmpM paralogues are likely the only  
126 porins in *V. parvula*, implying that nutrient acquisition and OM attachment are  
127 genetically linked in diderm Firmicutes, and likely all diderm Terrabacteria, via OmpM.  
128 Our results support an ancestral dual function of OmpM as both an OM tether and  
129 nutrient uptake porin which may have supported life in early bacteria.

130

## 131 **Results**

### 132 **VpOmpM1 is a trimeric porin with an extended periplasmic region**

133 We determined the structure of VpOmpM1 expressed in *E. coli* by single particle cryo-  
134 EM (Figure 1a-c and Supplementary Table 1). Reconstructions up to 3.2 Å without  
135 enforced symmetry revealed a trimeric arrangement of the protomers. The C-terminal  
136 16-stranded  $\beta$ -barrels that reside in the OM form a classical three-fold symmetrical  
137 porin trimer reminiscent of the well-characterised *E. coli* porins OmpF (EcOmpF) and  
138 OmpC<sup>34,35</sup>. However, the  $\beta$ -barrel lumens are constricted by inward-folded  
139 extracellular loops 3 and 7 in VpOmpM1 (Figure 1b), rather than solely by loop 3 as in  
140 the *E. coli* porins. The inter-protomer contact area, mediated by hydrophobic  
141 sidechains on the outside of the  $\beta$ -barrel, completely excludes lipid/detergent and  
142 solvent. The  $\beta$ -barrels exhibit other features common to known porin structures,  
143 including an aromatic girdle at the putative membrane-solvent interfaces and strong  
144 density surrounding the  $\beta$ -barrels that likely corresponds to the lipid moieties of LPS  
145 and phospholipid or detergent (Figure 1b, c and Supplementary Figure 1).

146 An unusual feature observed in the cryo-EM reconstructions was a weaker, elongated  
147 density that corresponds to the N-terminal SLH domain at the distal part, connected  
148 to the  $\beta$ -barrel via a triple coiled-coil (Figure 1c, d). We term this periplasmic region of  
149 VpOmpM1 the 'stalk'. Only the region of the stalk proximal to the OM was resolved

150 well enough for model building, as the cryo-EM density deteriorates towards the SLH  
151 domain end of the stalk. We speculated that the poor density is the result of movement  
152 of the stalk relative to the  $\beta$ -barrels. Measurements of the blurry SLH domain density  
153 observed in 2D class averages suggest that the distal part of the stalk spans 50-60 Å  
154 (Figure 1d). The VpOmpM1 trimer is pseudosymmetrical: while the  $\beta$ -barrels exhibit  
155 three-fold symmetry, the stalk is tilted relative to the membrane plane normal (Figure  
156 1c). The pseudosymmetry was confirmed by enforcing C3 symmetry during data  
157 processing, which resulted in a better-resolved  $\beta$ -barrel region (2.8 Å) but  
158 uninterpretable density for the periplasmic stalk (Supplementary Figure 2).

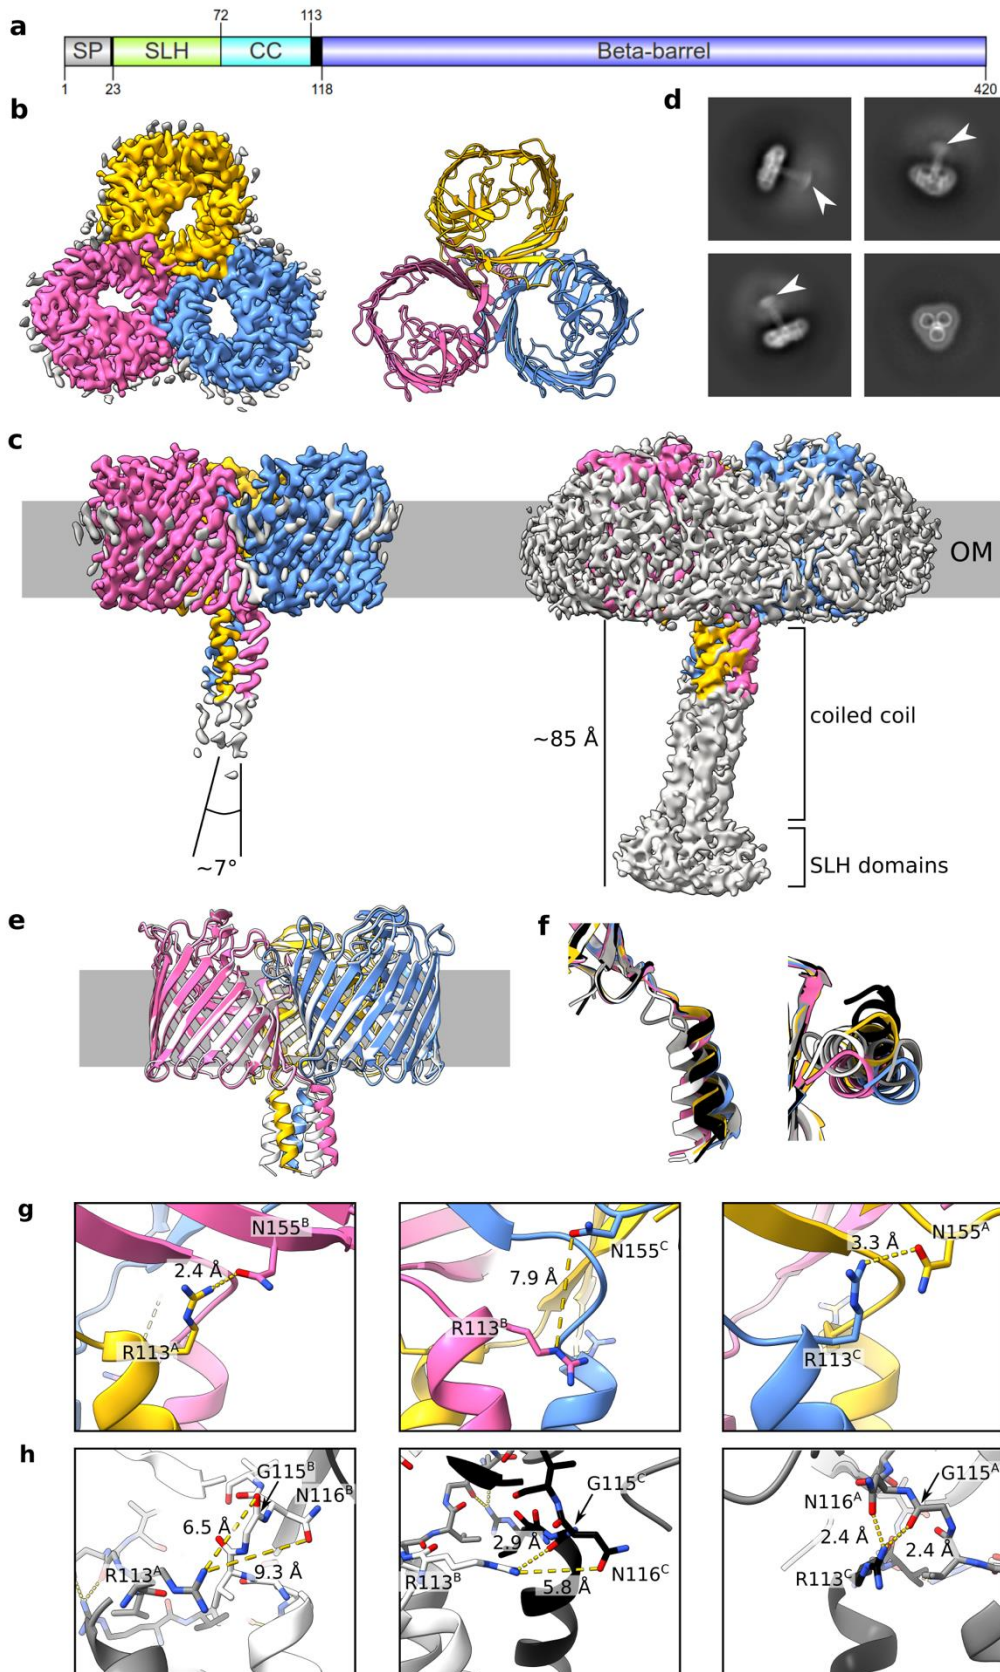

159

160 **Figure 1. Cryo-EM structures of VpOmpM1 expressed in *E. coli* and *V. parvula*.** **a**  
 161 Schematic depicting VpOmpM1 (UniProt A0A100YN03) domain arrangement and  
 162 boundaries. SP, signal peptide; SLH, S-layer homology; CC, coiled coil. Generated using IBS  
 163 2.0<sup>36</sup>. **b** Structure of recombinant VpOmpM1. The cryo-EM density is shown on the left and



164 the model is shown on the right as viewed towards the OM from outside the cell. **c** Side view  
165 of the cryo-EM density at high (left) and low (right) contour. The grey bar represents the outer  
166 membrane (OM). The diffuse grey density around the membrane region in the high contour  
167 view likely corresponds to lipid or detergent. **d** Representative 2D class averages. White  
168 arrowheads point to the diffuse SLH domain density. The edge of each square is 344.4 Å long.  
169 **e** Superposition of structures from recombinant VpOmpM1 (in colour) and native VpOmpM1  
170 purified from *V. parvula* (white). **f** Superposition of protomers from the recombinant (yellow,  
171 pink, blue) and native (grey, white, black) VpOmpM1 structures. The structural alignment was  
172 performed on the  $\beta$ -barrel region only (not shown). Left – side view, right – view from the  
173 periplasm towards the OM. **g, h** Inter-protomer contacts at the  $\beta$ -barrel-stalk interface in the  
174 recombinant (**g**) and native (**h**) structures. The protomer (A, B, C) for each sidechain is  
175 indicated in superscript.  
176

177 The *E. coli* cell wall does not contain polyaminated PG, the native ligand of VpOmpM1.  
178 Therefore, to exclude the possibility that in our structure of VpOmpM1 purified from *E.*  
179 *coli* the stalk region is misfolded due to the absence of polyaminated PG, we purified  
180 a His-tagged OmpM1 construct expressed in *V. parvula* (native VpOmpM1) and  
181 determined its structure by single particle cryo-EM to 3.3 Å resolution (Supplementary  
182 Table 1). The  $\beta$ -barrel structures are virtually identical ( $C\alpha$ - $C\alpha$  root-mean-square  
183 deviation 0.239 Å), but there are differences in the relative orientation of the stalk  
184 (Figure 1e). In reconstructions without enforced symmetry, the  $\alpha$ -helices forming the  
185 coiled-coil are not equivalent in either dataset, as they exit the OM plane in different  
186 orientations (Figure 1f). The reasons for these structural differences are not obvious.  
187 We speculated that intra- or inter-protomer hydrogen bonds at the stalk-barrel  
188 interface could be responsible for the subtle conformational differences. In the *E. coli*  
189 VpOmpM1 structure, the sidechain of R113 in one protomer interacts with the  
190 sidechain of N155 (part of the periplasmic end of the  $\beta$ 2 strand) of another protomer.  
191 This interaction is observed only in two inter-protomer interfaces, but not the third one  
192 (Figure 1g). A similar interaction was observed in the native VpOmpM1 structure: at  
193 two inter-protomer interfaces, R113 interacts with the carbonyl oxygen of G115 and  
194 the sidechain of N116 (both part of the  $\beta$ -barrel end of the stalk) (Figure 1h).  
195 Interestingly, the R113-N155 interaction was not observed in the native VpOmpM1

196 structure, and the R113-G115/N116 interaction was not observed in the VpOmpM1  
197 structure from *E. coli*. It is possible that the two constructs differ slightly in their lowest  
198 energy states which are observed in the averaged cryo-EM data.

199

200 We performed all-atom molecular dynamics (MD) simulations to investigate the  
201 conformational space sampled by the stalk. We simulated the native VpOmpM1 model  
202 to which an AlphaFold2<sup>37</sup> prediction of the unmodeled region of the stalk was grafted  
203 and fit into the low resolution cryo-EM density (Figure 2a). The simulations revealed  
204 substantial movement of the stalk in the periplasmic space (Supplementary Movie 1).  
205 The SLH domain end of the stalk sampled a span of ~50 Å (Figure 2b) during the  
206 simulations, in agreement with the cryo-EM data (Figure 1d). The coiled-coil does not  
207 kink throughout the 1 μs simulation (Figure 2c), and the movement of the stalk is due  
208 to flexibility at the interface between the stalk and the β-barrels. We observed that the  
209 inter-protomer hydrogen bonds identified in our static cryo-EM structures, R113-N155  
210 and R113-G115, are broken and re-formed throughout the simulation (Figure 2d). The  
211 R113 interaction with the sidechain of N116 was not stable, and R113 instead  
212 interacted with the backbone carbonyl oxygen of N116 (Figure 2d). Similar results  
213 were obtained from a replicate simulation with the AlphaFold2 graft model as well as  
214 the native VpOmpM1 cryo-EM model by itself (Supplementary Figure 3). The stalk  
215 would presumably be bound to the relatively immobile PG in vivo, which would  
216 significantly impair its mobility relative to the OM. We speculate that the flexible  
217 interface between the stalk and the β-barrels would result in the ability of the OM to  
218 move slightly relative to the PG, imparting mechanical resistance to the cell envelope.

219

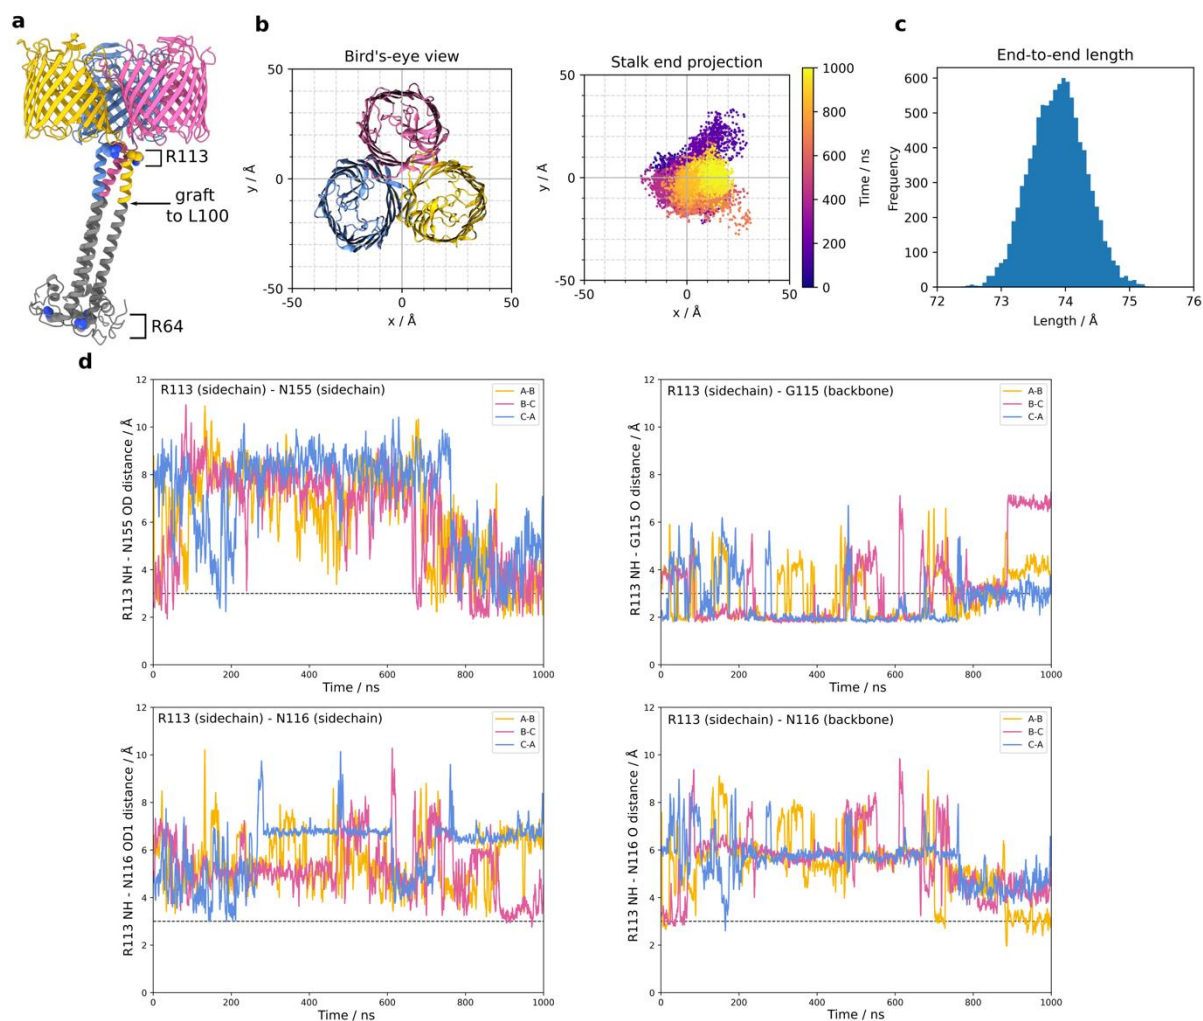

220

221 **Figure 2. All-atom molecular dynamics simulations with native VpOmpM1.** **a** The  
 222 AlphaFold2 prediction for the stalk (grey) was grafted onto the N-terminus of the first residue  
 223 (L100) modelled into the experimental density of native VpOmpM1 (in colour). R64 (bottom of  
 224 SLH domain) and R113 are shown as space filling models. **b** Bird's-eye-view of the  $\beta$ -barrel  
 225 region from outside the OM (left) and a plot of the stalk end projection (centre of mass of the  
 226 R64  $C\alpha$  atoms) over the 1  $\mu$ s simulation (right). The observation point in the left and right  
 227 panels is equivalent. **c** Frequency distribution of stalk lengths (R64-R113  $C\alpha$ - $C\alpha$ ) observed  
 228 throughout the simulation. **d** Distances between the R113 sidechain and interacting sidechain  
 229 atoms throughout the simulation. The dotted line denotes an inter-atomic distance of 3  $\text{\AA}$ . The  
 230 equivalent plots for a replicate simulation and a simulation without the AlphaFold2 graft are  
 231 presented in Supplementary Figure 3.

### 232 **Polyaminated PG is potentially recognised by conserved tyrosine residues**

233 The SLH domain of OmpM binds polyaminated PG *in vivo*, as demonstrated in *V.*  
 234 *parvula* (Kamio & Nakamura, 1987) and *S. ruminantium*<sup>18,24</sup>. The cryo-EM density for  
 235 VpOmpM1 SLH domains was not sufficiently resolved for model building due to  
 236 movement of the stalk, as demonstrated by MD simulations. We used bioinformatics  
 237 and structural comparisons to investigate where polyaminated PG could bind within

238 the AlphaFold2 predicted model of VpOmpM1 SLH domains. Monoderm bacteria  
239 attach cell surface proteins to SCWPs via triple tandem SLH domain repeats in a  
240 single protein chain, which fold into a core three  $\alpha$ -helix bundle with additional helices  
241 and loops packing against this bundle<sup>38–42</sup>. Crystal structures of the SLH domains 1-3  
242 of *Bacillus anthracis* surface array protein (Sap) and *Paenibacillus alvei* S-layer protein  
243 SpaA are similar to the predicted VpOmpM1 SLH domain<sup>39,40</sup> (Figure 3a) with C $\alpha$ -C $\alpha$   
244 r.m.s.d values of 1.0 and 1.3 Å, respectively. The main difference is that both Sap and  
245 SpaA have short core helical bundles, but the VpOmpM1 central bundle extends into  
246 the long coiled-coil that connects it to the  $\beta$ -barrels. Structures of SpaA bound to  
247 defined SCWP ligands show that the sugars bind in grooves between SLH repeats  
248 (Figure 3a) and interact with conserved motifs therein: conserved tryptophan and  
249 glycine residues bind the sugar moiety (W34 and G58 in VpOmpM1), and the arginine  
250 of the TRAE motif forms a salt bridge with the ketal-pyruvate modification of the SCWP  
251 (residues 63-66, TRYE, in VpOmpM1). It is not surprising that these motifs are  
252 conserved in OmpM (Figure 3b and c) because most OmpM-like proteins from  
253 Terrabacteria other than the Negativicutes are thought to bind pyruvylated SCWP.  
254  
255 Negativicute OmpM proteins are thought to recognise the polyamine modification on  
256 the  $\alpha$ -carboxylate of the D-glutamate in the PG peptide stem. Crystal structures of  
257 proteins bound to putrescine<sup>43–45</sup> and cadaverine<sup>46,47</sup> indicate that aromatic residues  
258 are involved in binding these polyamines via stacking interactions with the aliphatic  
259 chain of the polyamine. We compared subsets of OmpM SLH domain sequences from  
260 all Terrabacteria either excluding the Firmicutes, or from only the Firmicutes, or from  
261 only the Negativicutes to non-OmpM SLH domain sequences from the Firmicutes. We  
262 found that the tyrosine residue Y36 is highly conserved in the Negativicutes, slightly  
263 less conserved within the Firmicutes, and not conserved in OmpM homologues from

264 other phyla and non-OmpM SLH domains (Figure 3b and c). Also, Y65 of the TRYE  
265 motif is more conserved in the Negativicutes than in other groups. Mapping the  
266 conserved residues onto the predicted VpOmpM1 SLH domain structure reveals that  
267 the conserved tyrosines are located away from the grooves between the SLH chains  
268 that contain the putative PG disaccharide binding site (Figure 3d). We suggest that  
269 the peptide stem containing the polyamine moiety could extend away from the  
270 disaccharide binding groove to interact with either of the conserved tyrosines.  
271 Alternatively, or perhaps additionally, PG interaction could induce conformational  
272 changes that bring the tyrosine side chains closer to the binding groove. These  
273 possibilities will have to be further investigated by binding studies and by determining  
274 structures of the SLH domain with purified PG fragments.

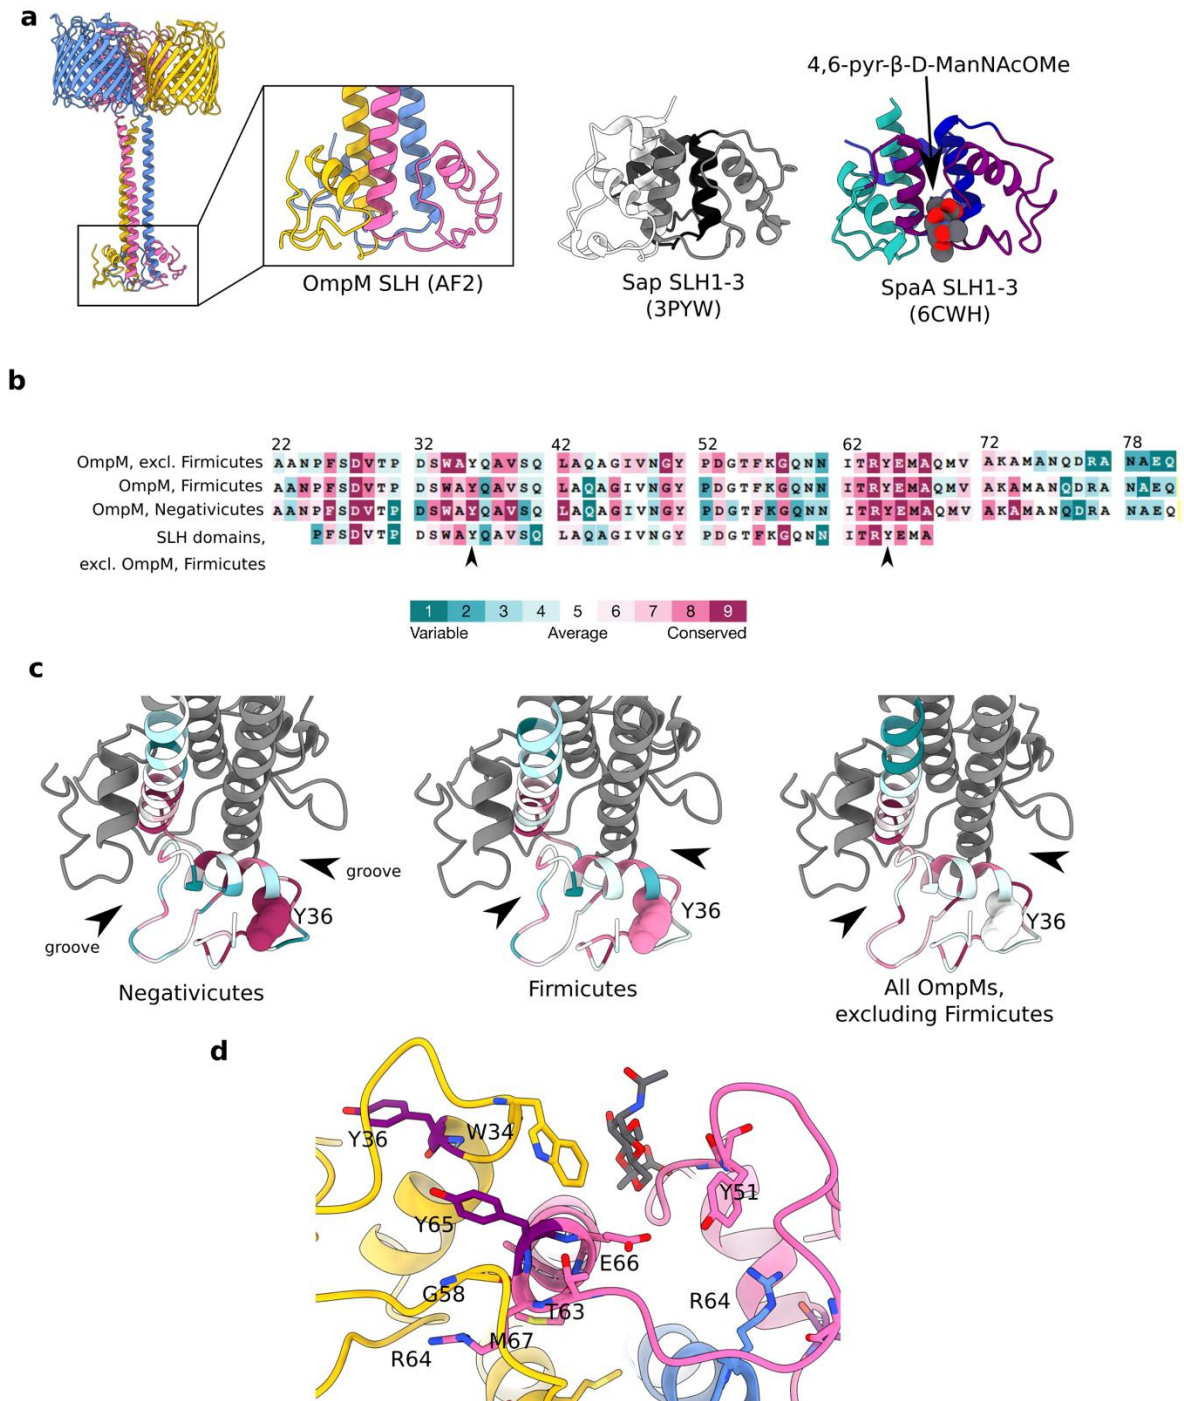

275

276 **Figure 3. Analysis of the putative peptidoglycan binding site within the SLH domain. a**  
 277 Close up view of the VparOmpM1 SLH domains predicted by AlphaFold2, the crystal structure  
 278 of SLH domains 1-3 from *Bacillus anthracis* Sap (surface array protein) (PDB 3PYW)<sup>39</sup>, and  
 279 the crystal structure of SLH domains 1-3 from *Paenibacillus alvei* SpaA in complex with the  
 280 monosaccharide 4,6-pyr- $\beta$ -D-ManNAcOMe (space-filling representation) (PDB 6CWH)<sup>40</sup>.  
 281 Views were generated from a superposition. **b** Multiple sequence alignment results from  
 282 different subsets of SLH domain-containing proteins mapped onto the sequence of VpOmpM1  
 283 SLH domain and coloured by conservation using ConSurf<sup>48</sup> (colour key). Row 1 -  
 284 representative OmpM homologues from across the Terrabacteria, except the Firmicutes (211  
 285 sequences); row 2 – representative OmpM homologues from all diderm Firmicutes (67  
 286 sequences); row 3 – OmpM homologues from Negativicutes (615 sequences); row 4 – SLH  
 287 domains from proteins other than OmpM found in all Firmicutes (60 sequences). The arrows

288 point to Y36 and Y65, which could be important for binding polyaminated PG. **c** ConSurf  
289 results mapped onto the predicted SLH domains of VpOmpM1 (same sequence subsets and  
290 colour key as **b**). Arrows point to the grooves between SLH protomers. Y36 is shown in space-  
291 filling representation. The datasets used for ConSurf analysis correspond to the datasets used  
292 in a previous study<sup>16</sup> that were subsampled using custom scripts. **d** Conserved residues  
293 shown as stick models on the predicted SLH structure, coloured by chain, except for Y36 and  
294 Y65 which are in purple. SpaA bound to monosaccharide (PDB 6CWH) was superposed onto  
295 the VpOmpM1 SLH structure; the monosaccharide is in grey, the SpaA protein model is not  
296 shown.

297

298 We generated a soluble construct encompassing almost the entire VpOmpM1 stalk  
299 region (residues 22-107) in *E. coli* and determined its crystal structure to 1.7 Å (Figure  
300 4a, Supplementary Table 2) in an attempt to verify the AlphaFold2 prediction for this  
301 region. Surprisingly, the crystallized stalk does not fold into a coiled-coil but forms a  
302 compact trimer composed mainly of  $\alpha$ -helical bundles (residues 23-105). The  
303 protomer interfaces form grooves on one side of the trimer that could potentially  
304 accommodate ligands (Figure 4b). However, mapping of putative PG-binding residues  
305 onto the stalk crystal structure shows they are spread across the structure  
306 (Supplementary Figure 4), suggesting that this conformation of the stalk does not bind  
307 PG. The residues that form the coiled-coil in the extended AlphaFold2 prediction  
308 instead form helical hairpins and extensive intra-protomer interactions rather than  
309 interact with the other chains in the asymmetric unit (Figure 4c). We obtained a very  
310 similar structure, albeit at a lower resolution, with a longer construct that encompasses  
311 the entire stalk region (residues 22-118). A DALI<sup>49</sup> search of the PDB using these  
312 models showed that the SLH domain crystal structure has low structural similarity to  
313 other proteins (Supplementary Figure 5).

314

315 The protomer fold of the stalk observed in the crystal structures aligns well with an  
316 alternative, compact conformation predicted by AlphaFold2 (Figure 4d and e,  
317 Supplementary Figure 6). This was also surprising as the confidence for this prediction  
318 was low, yet it agreed with the experimental structure. However, the trimerization

319 interface in the compact stalk prediction is different: residues that are far away in the  
320 crystal structure (e.g. M75) interact in the predicted compact conformation (Figure 3e).  
321 We hypothesised that this compact state could be an unstable high energy  
322 conformation (hence the low prediction confidence), and that the stalk construct is  
323 stabilized in a similar high energy conformation in the crystallization condition. All-atom  
324 MD simulation of VpOmpM1 with the compact stalk showed the stalk helix of one  
325 protomer reaching towards the OM, partially occluding the  $\beta$ -barrel of another  
326 protomer and forming salt bridges with its periplasmic turns (Figure 4f and  
327 Supplementary Movie 2). Additionally, this conformation was stabilised by inter-  
328 protomer hydrogen bonds in the stalk region (Supplementary Figure 7). The role of  
329 this interaction is unclear, but this simulation supports the dynamic nature of the stalk.

330

331 The two strikingly different stalk conformations of VpOmpM1 imply that either there is  
332 conformational switching under the appropriate conditions (e.g. cell envelope stress,  
333 presence of specific ligands), or that the protein is committed to a particular  
334 conformation during biogenesis. In one replicate of the all-atom MD simulations of the  
335 native VpOmpM1-AlphaFold2 graft model (Figure 2a) we observed unfolding of the  
336 very N-terminus of the SLH domain of one chain, which then proceeded to interact  
337 with residues of the coiled-coil (Supplementary Movie 3, Supplementary Figure 8).  
338 This suggests some flexibility for the SLH domain, and perhaps *in vivo* this flexibility  
339 is important for the SLH domain to find its PG ligand. The coiled-coil, however,  
340 remained stable during the simulation. Protein melting temperature analysis by  
341 dynamic scanning calorimetry suggested that the melting temperature of the stalk in  
342 the full-length VpOmpM1 construct is  $\sim 87^{\circ}\text{C}$  (Supplementary Figure 9), which means  
343 that the coiled-coil interaction is very stable and is unlikely to unfold under  
344 physiological conditions. Therefore, the more favourable hypothesis is that the



345 VpOmpM1 trimer is committed to either the extended or compact stalk conformation  
346 during biogenesis.

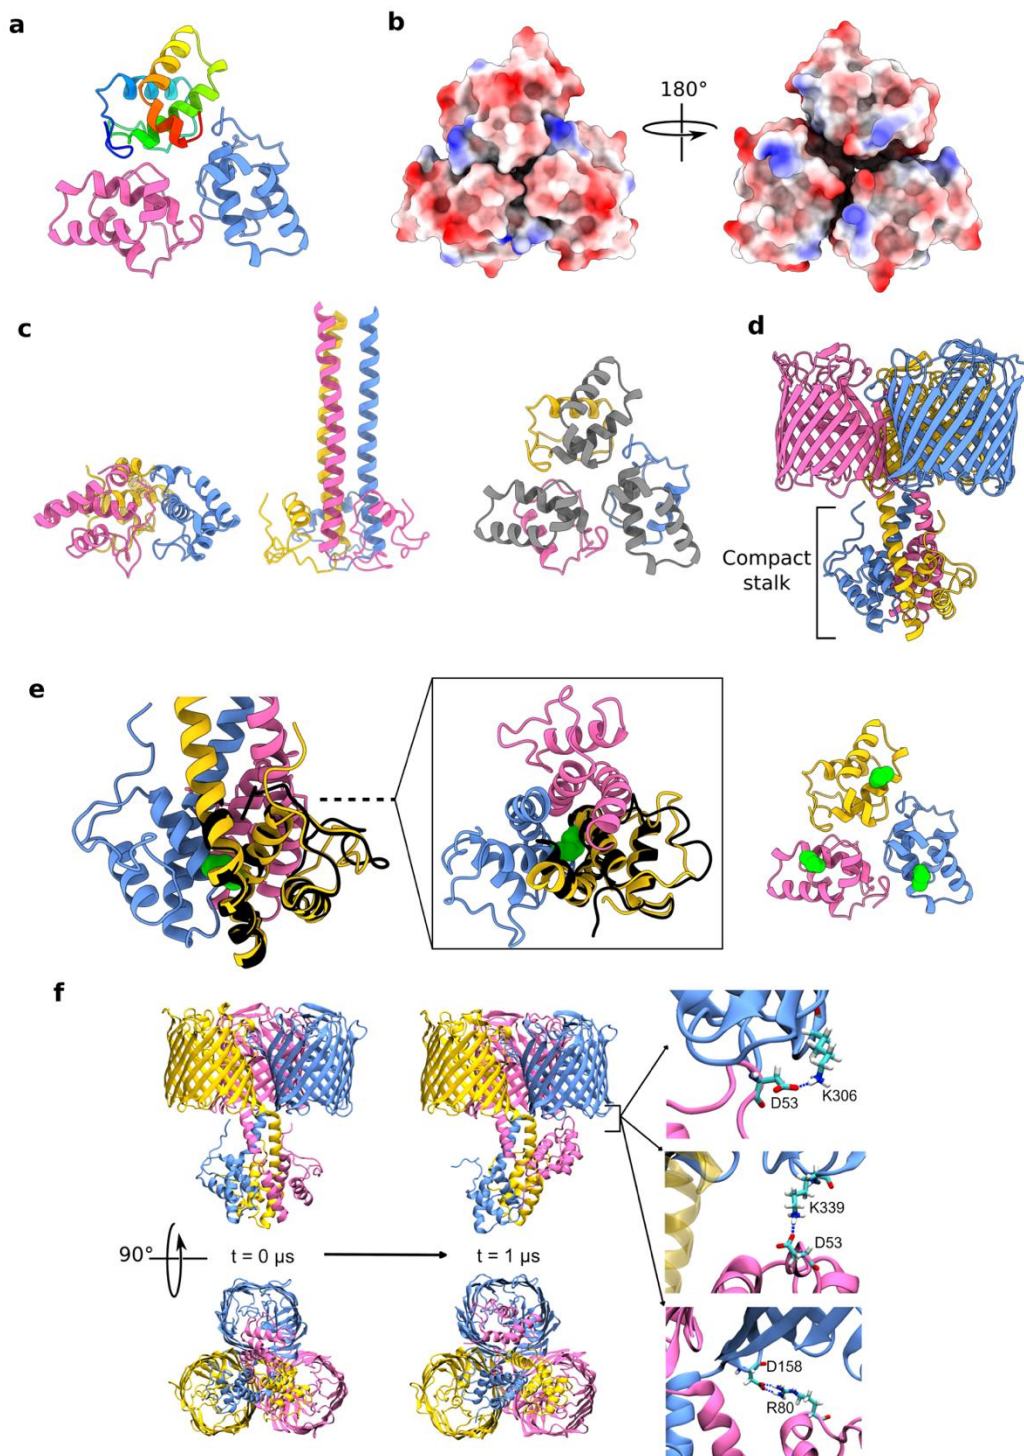

347

348 **Figure 4. Crystallography and AlphaFold2 show evidence of alternate stalk**  
349 **conformations.** **a** Crystal structure of VpOmpM1 stalk trimer at 1.7 Å. Residues 23-105 were  
350 resolved. One chain is in rainbow: N-terminus is blue, C-terminus is red. **b** Electrostatic surface  
351 presentation of the stalk crystal structure. (Left) Putative view from the OM and (right) from  
352 the periplasm. **c** Comparison of the stalk crystal structure (left) and AlphaFold2 predicted  
353 extended conformation (middle). Only residues 23-105 are displayed for both. (Right)

354 Residues 64-105 of the stalk crystal structure that form the extended coiled-coil in the  
355 AlphaFold2 prediction are in grey. **d** Alternative, compact stalk conformation predicted by  
356 AlphaFold2. **e** Close up view of the compact stalk prediction with a single chain from the crystal  
357 structure (black) superposed ( $C\alpha$ - $C\alpha$  r.m.s.d. 0.78 Å) (left). (Middle) Top view down the  
358 section marked by the dashed line. (Right) Stalk crystal structure. The sidechain of M75 is  
359 shown in green space-filling representation in each panel. **f** All-atom MD simulation of  
360 AlphaFold2 predicted compact stalk model over 1  $\mu$ s. The SLH domain of one of the protomers  
361 (pink) reaches towards the OM and interacts with the periplasmic turns of the  $\beta$ -barrel of  
362 another protomer (blue). The salt bridges shown on the right had occupancies of 5.8%, 3.44%  
363 and 1.89% (top to bottom) throughout the simulation.

364  
365

### 366 **OmpM paralogues are the only general diffusion porins in *V. parvula***

367 The  $\beta$ -barrel of VpOmpM1 consists of 16 anti-parallel  $\beta$ -strands connected by  
368 extracellular loops and periplasmic turns (Figure 1b,c). The overall structure is similar  
369 to EcOmpF, and the differences lie in the extracellular loops (Figure 5a and  
370 Supplementary Figure 10). VpOmpM1 extracellular loops 3 and 7 fold into the  $\beta$ -barrel  
371 to form the constriction. In EcOmpF and similar Proteobacterial general porins the  
372 constriction is formed solely by loop 3 (Figure 5a). The eyelet (the narrowest region of  
373 the pore) is formed by sidechains projecting from the  $\beta$ -barrel strands into the lumen  
374 as well as sidechain and backbone atoms of the constricting loop residues (Figure 5b).  
375 It is thought that an electric field exists across the eyelet of EcOmpF as a result of  
376 asymmetric distribution of charged residues<sup>50,51</sup>, and a similar charge asymmetry is  
377 seen in the eyelet of VpOmpM1 (Figure 5b). Analysis of the pore radius of both  $\beta$ -  
378 barrels by the HOLE program<sup>52</sup> reveals a maximal constriction of  $\sim 3.7$  Å (Figure 5c).  
379 However, in EcOmpF the extent of the constriction ( $\pm 0.1$  Å) along the axis  
380 perpendicular to the membrane plane is  $\sim 2.4$  Å, and the VpOmpM1 constriction  
381 extends for  $\sim 7$  Å.

382

383 We tested the potential of VpOmpM1 to transport small molecules across membranes  
384 in liposome swelling assays (Figure 5d). Notably, VpOmpM1 could transport lactate,  
385 which is essential for *V. parvula* growth, and putrescine, which is used for modification

386 of the PG peptide stem. We also observed transport of the amino acids arginine,  
387 lysine, glutamate, aspartate, glycine, alanine, leucine, and methionine. VpOmpM1  
388 transported monosaccharides, even though *V. parvula* is asaccharolytic, but not  
389 disaccharides, which underlines the non-specific, size-limited nature of the transport  
390 activity. We carried out experiments with a VpOmpM1 construct that lacks the stalk to  
391 test if the stalk is involved in regulating transport, but this construct had similar  
392 transport properties to the full-length protein (Figure 5d). The only exception was  
393 impaired transport of arginine and alanine, and the reasons for this are unclear.  
394 VpOmpM1 had a similar substrate permeation profile to EcOmpF but showed  
395 consistently lower transport rates, which could be the consequence of a longer  
396 constriction region and the presence of additional charges in the eyelet (Figure 5b, c).  
397 One notable difference is that there was little transport of ampicillin, kanamycin and  
398 gentamicin by VpOmpM1 compared to EcOmpF (Figure 5d), but the relevance of this  
399 for antibiotic resistance *in vivo* is unclear.

400

401 We further characterised the channel properties of VpOmpM1 in bilayer  
402 electrophysiology experiments. Initially, we obtained conductance value distributions  
403 from recordings with multiple channel insertion events (Figure 5e and Supplementary  
404 Figure 11a,b). The resulting distributions were very broad and centred at  $4.87 \pm 1.86$   
405 nS and  $4.66 \pm 1.88$  nS for the full-length and barrel-only constructs of VpOmpM1,  
406 respectively. The broad conductance distributions are likely due to multiple sub-  
407 conductance states of the channel, as observed in recordings where the channels can  
408 randomly close to different extent (Figure 5f and Supplementary Figure 11c,d). We  
409 were able to get more accurate conductance values from single channel recordings:  
410  $4.34 \pm 0.46$  nS (s.d., n=8) for full-length VpOmpM1 and  $4.37 \pm 0.28$  nS (s.d., n=8) for  
411 barrel-only VpOmpM1. In single channel recordings at higher voltages, we

412 occasionally observed classical trimeric porin behaviour where the three protomer  
413 pores close sequentially (Figure 5f and Supplementary Figure 11c,d). Using our setup  
414 we obtained a conductance of  $4.28 \pm 0.19$  (s.d., n=9) for EcOmpF, which is similar to  
415 previously reported values<sup>53,54</sup> and to VpOmpM1 conductance. Current-voltage  
416 characteristics for both VpOmpM1 constructs and EcOmpF were again very similar  
417 (Figure 5g).

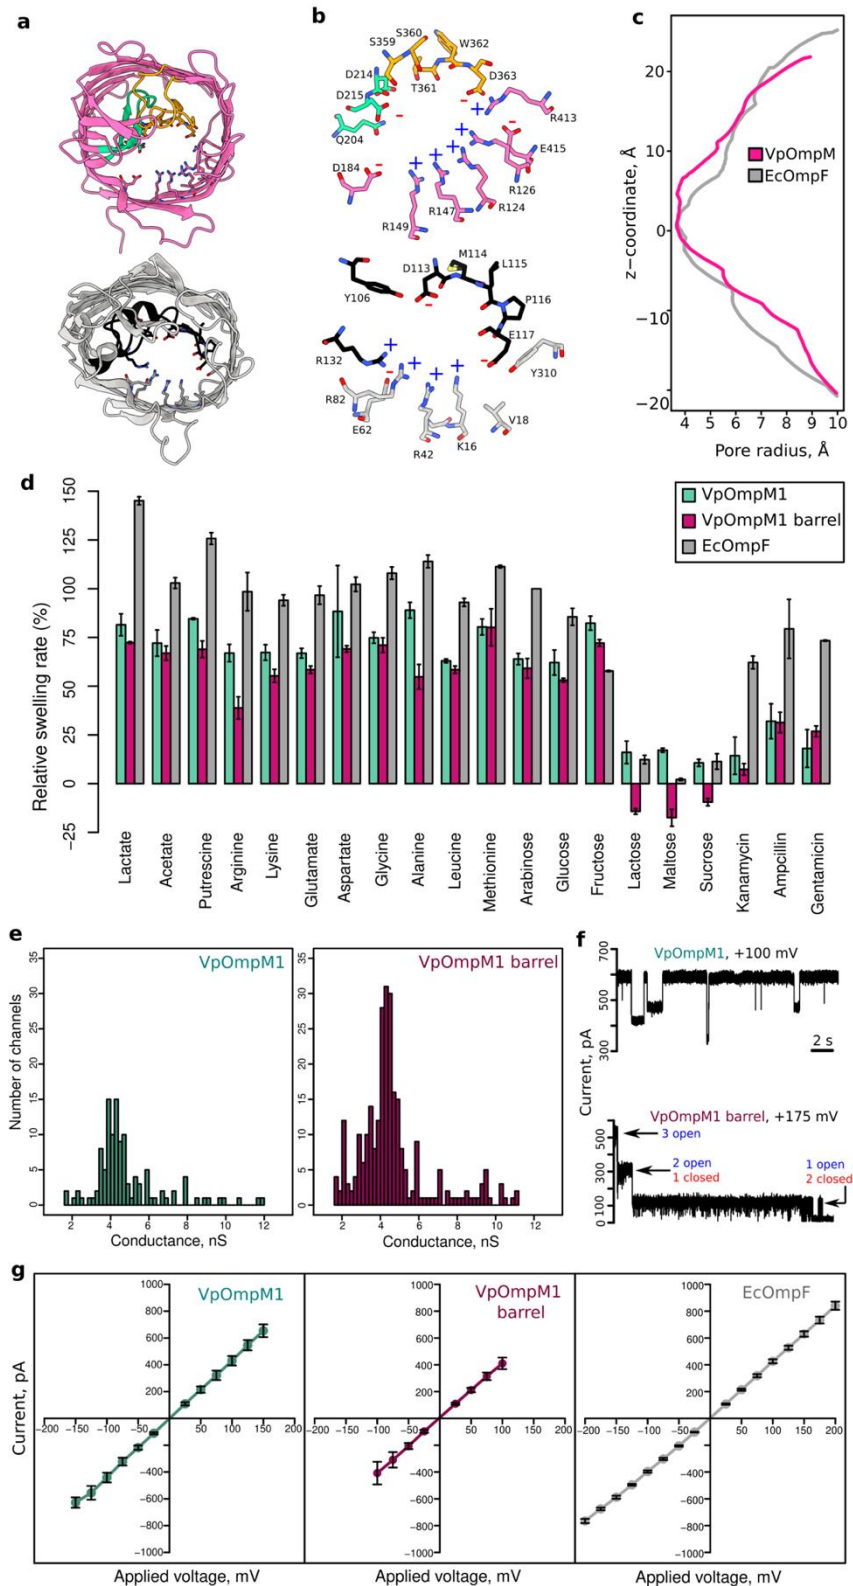

418

419 **Figure 5. VpOmpM1 has general diffusion channel properties.** **a**  $\beta$ -barrel from the C3 cryo-  
 420 EM reconstruction of VpOmpM1 (top) and an EcOmpF protomer (PDB 3POQ)<sup>55</sup> (bottom). The  
 421 views are generated from a superposition. VpOmpM1 loops 3 and 7 are in green and orange,  
 422 respectively; EcOmpF loop 3 is in black. Residues forming the eyelet are shown in stick  
 423 representation. **b** Close-up view of the eyelet regions of VpOmpM1 (top) and EcOmpF  
 424 (bottom). Colours as in **a**. Positively and negatively charged residues lining the eyelet are  
 425 annotated with a blue plus or red minus sign, respectively. **c** HOLE<sup>52</sup> profile of VpOmpM1 and

426 EcOmpF. The z-coordinate is perpendicular to the membrane plane and its origin is at the  
427 narrowest part of the VpOmpM1 eyelet. **d** Liposome swelling in the presence of indicated  
428 substrate. Liposomes with embedded full-length VpOmpM1, VpOmpM1 barrel-only or  
429 EcOmpF were tested. Swelling rates were normalised to the rate of swelling of EcOmpF-  
430 containing liposomes in the presence of arabinose. Each condition was measured in technical  
431 triplicates from the same liposome preparation. Error bars show  $\pm$  s.d. **e** Bilayer  
432 electrophysiology conductance distribution plots obtained from recordings with multiple  
433 insertion events (see Supplementary Figure 11a for representative traces). Full-length  
434 VpOmpM1 distribution is centred on  $4.87 \pm 1.86$  nS (s.d., n=117); VpOmpM1 barrel-only  
435 distribution is centred on  $4.66 \pm 1.88$  nS (s.d., n=269). **f** Representative bilayer  
436 electrophysiology recordings of full-length VpOmpM1 (top) showing multiple sub-conductance  
437 states and of the barrel-only construct (bottom) showing classical trimeric porin sequential  
438 channel closure at high voltage. **g** Current-voltage characteristics from single channel  
439 recordings of full-length VpOmpM1, barrel-only VpOmpM1 and EcOmpF. Data from at least  
440 three channel recordings were used at each applied voltage.  
441

442 We conclude that VpOmpM1 is a general diffusion channel in *V. parvula*, with similar  
443 properties to EcOmpF. We expect that the VpOmpM2-4 paralogues also function as  
444 nutrient uptake channels based on their sequence similarity<sup>16</sup>. We think it unlikely that  
445 the other two putative porins of *V. parvula*, FNLLGLLA\_00518 (OmpA-like) and  
446 FNLLGLLA\_00833, also transport nutrients because they are predicted to only have  
447 10 strands in their  $\beta$ -barrels (Figure 6a,b). Previous work on 10-stranded  $\beta$ -barrels has  
448 shown that their lumen is occluded by amino acid residue sidechains and that they  
449 cannot perform major transport roles<sup>56,57</sup>, and we wanted to verify this experimentally.  
450 We could produce the  $\beta$ -barrel region of FNLLGLLA\_00518 in sufficient quantities for  
451 liposome swelling experiments. It did not transport lactate and arabinose, and could  
452 only transport putrescine and glycine at much slower rates than VpOmpM1 and  
453 EcOmpF (Figure 6c), in agreement with reported transport properties of small OM  $\beta$ -  
454 barrels<sup>58,59</sup>. Therefore, FNLLGLLA\_00518 is not a general porin. We were not able to  
455 test the transport activity of FNLLGLLA\_00833 because the protein could not be  
456 expressed in *E. coli*, but we expect this 10  $\beta$ -stranded OM protein to have very low  
457 substrate permeation rates as well.

458

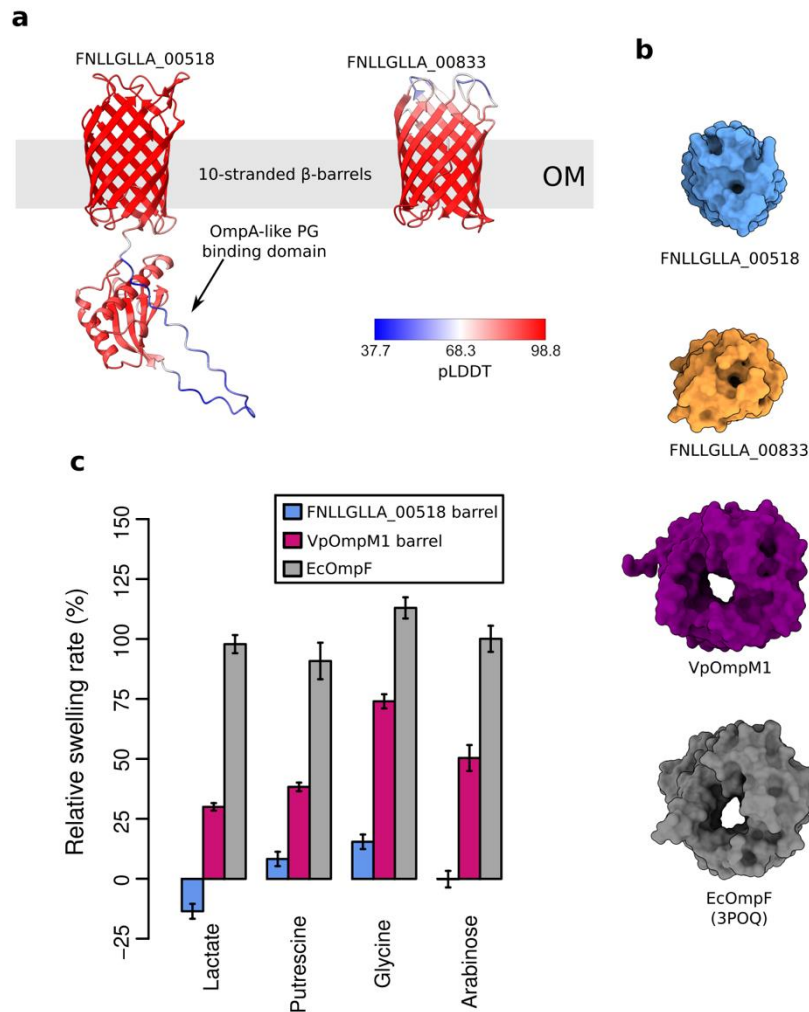

459

460 **Figure 6. *V. parvula* OM proteins other than OmpM paralogues are unlikely to be general**  
461 **diffusion channels.** **a** AlphaFold2<sup>37</sup> models of the FNNLGLLA\_00518 (OmpA-like) and  
462 FNNLGLLA\_00833 proteins. The colours represent the per residue confidence of the  
463 prediction (pLDDT). **b** Molecular surface models of *V. parvula* OM proteins and EcOmpF as  
464 viewed from outside the cell. **c** Comparative liposome swelling assays with FNNLGLLA\_00518  
465  $\beta$ -barrel, VpOmpM1  $\beta$ -barrel, and EcOmpF.

466

467

## 468 **Discussion**

469 Together, our results show that OmpM has a dual function as an OM tethering system  
470 and a nutrient uptake channel. Our structures, simulations and functional data provide  
471 insight into how these key OM-related functions are linked in the diderm Firmicutes  
472 and probably many other diderm bacteria that lack the well-characterised OM  
473 attachment systems present in the Gracilicutes.

474

475 Interestingly, structural data and MD simulations show that the extended stalk of  
476 VpOmpM1 is highly mobile. The functional consequences of this mobility are not clear,  
477 and neither is it clear why it is preferable to a rigid connection between the PG and  
478 OM. One possibility is that the stalk samples the local environment to find  
479 polyaminated-PG. Although one would expect the polyamine modification to be  
480 present on most peptide stems, PG spatial organization is not well understood, and it  
481 is unclear what proportion of the modified peptide stems is easily accessible to the  
482 SLH domains of VpOmpM1. Another possibility is that the flexible interface between  
483 the stalk and the  $\beta$ -barrels imparts favourable mechanical properties to the cell  
484 envelope, as having a somewhat flexible PG-OM tether would allow the OM to deform  
485 slightly when external mechanical forces are applied.

486

487 Using an integrative approach, we have shown that VpOmpM1 might exist in multiple  
488 conformations, despite the fact we did not observe any particle populations with a  
489 compact stalk in our cryo-EM datasets. Unravelling the roles of both potential states  
490 of the stalk is a challenging problem that will likely have to be resolved using *in vivo*  
491 studies. We expect that the extended stalk state observed in cryo-EM reconstructions  
492 is the PG-binding state based on structural comparisons with SCWP-binding SLH  
493 domains from monoderm bacteria. However, we cannot exclude that both states are



494 competent to bind PG. Additionally, the VpOmpM1 stalk represents a newly identified  
495 variation on SLH domains. The three copies of the SLH domain from separate protein  
496 chains come together to form three likely identical ligand-binding sites, whereas  
497 previously characterised triple SLH domains are encoded in a single chain and their  
498 ligand-binding grooves have different affinities for SCWPs due to differences in  
499 binding motif residues in each SLH repeat<sup>40,42,60,61</sup>. The functional consequences of  
500 having equivalent or non-equivalent ligand binding sites are not clear in the context of  
501 a protein anchoring to the PG/SCWP.

502

503 SlpA from *D. radiodurans* is the only other OmpM-like protein for which structures have  
504 been so far available<sup>29,30</sup>. SlpA, like VpOmpM1, plays an important role in maintaining  
505 cell envelope integrity<sup>16,31</sup>. VpOmpM1 is similar to SlpA only in its overall architecture:  
506 both proteins are trimers and have an N-terminal SLH domain connected via a coiled-  
507 coil to a C-terminal  $\beta$ -barrel domain. However, the VpOmpM1  $\beta$ -barrel trimer is  
508 approximately the size of a single SlpA  $\beta$ -barrel (Supplementary Figure 12).  
509 Consequently, the pore inside the SlpA  $\beta$ -barrel, although constricted by extracellular  
510 loop insertions, is much larger than in VpOmpM1 and is  $\sim 14$  Å in diameter at the  
511 narrowest point. VpOmpM1 clearly imposes a size filter for diffusion across the OM  
512 (Figure 5) and prevents leakage of large periplasmic contents outside the cell. SlpA  
513 has been shown to transport nutrients<sup>30</sup>, but it is unclear how escape of periplasmic  
514 material via the massive SlpA  $\beta$ -barrel pore is prevented *in vivo*. Other components of  
515 the complex and unusual cell envelope of *D. radiodurans* could partially obstruct the  
516 SlpA pore<sup>32,33</sup>. A  $\beta$ -sandwich protein (DR\_0644) was observed bound at the top of the  
517 stalk and the  $\beta$ -barrel interface in one SlpA structure<sup>29</sup>, and there are no homologues  
518 of this protein present in the *V. parvula* genome. The authors of one study note that

519 large (28-30 strand)  $\beta$ -barrels in OmpM-like proteins could be confined to the  
520 Deinococcus-Thermus phylum<sup>29</sup>, thus, the unusual  $\beta$ -barrel structure of SlpA and the  
521 partner protein DR\_0644 might be adaptations to extreme environments in which  
522 members of this phylum are found. VpOmpM1, on the other hand, could be more  
523 representative of OmpM proteins in mesophilic diderm Terrabacteria.

524

525 The  $\beta$ -barrel of Mep45, the OmpM homologue from *S. ruminantium*, has been shown  
526 to form a diffusion channel with similar properties to VpOmpM1, albeit with a larger  
527 estimated diameter (11.6 Å) than VpOmpM1 (7.4 Å)<sup>19</sup>. Cyanobacterial OmpM  
528 homologues have been shown to form small channels that facilitate transport of  
529 inorganic ions<sup>20</sup>. Our VpOmpM1 structures suggest that OmpM homologues from  
530 these and perhaps most diderm Terrabacteria might be similar to proteobacterial  
531 porins, unlike *D. radiodurans* SlpA. Structural similarity to evolutionarily distant porins  
532 supports the hypothesis that OmpM is an ancestral OM tethering system that may  
533 have been present in the last common bacterial ancestor<sup>16</sup>.

534

535 Our results show that nutrient acquisition and OM tethering are genetically linked via  
536 OmpM in *V. parvula* and likely in all Negativicutes and other diderm Terrabacteria. We  
537 support the hypothesis that deletion of or mutations in *ompM* promoted loss of the  
538 OM<sup>16,62</sup> and extend it by proposing that it was due to the concurrent loss of two key  
539 OM-related functions, tethering and nutrient uptake. Although we envisage that OmpM  
540 plays similar roles in all diderm Terrabacteria, experimental characterisation of OmpM  
541 orthologues from diverse organisms will be required to fully capture the conservation  
542 and variation of this ancient OM tether system.

543

544 **Methods**

## 545 **Bacterial strains, culture conditions and strain manipulation**

546 Bacterial strains used in this work are listed in Supplementary Table 3. *E. coli* strains  
547 were genetically manipulated using standard laboratory procedures<sup>63</sup>. When needed,  
548 the following compounds were added to *E. coli* cultures at the following concentrations:  
549 ampicillin (liquid media) or ticarcillin (solid media) – 100 mg/l, chloramphenicol – 30  
550 mg/l (liquid media) or 25 mg/l (solid media), kanamycin – 50 mg/ml, apramycin – 50  
551 mg/l, diaminopimelic acid – 300 µM.

552

553 *V. parvula* was manipulated as described previously<sup>16,64,65</sup>. When needed, the  
554 following compounds were added to *V. parvula* cultures at the following  
555 concentrations: chloramphenicol – 25 mg/l, anhydrotetracycline – 250 µg/l. The  
556 anaerobic conditions were generated using the GenBag Anaer generator  
557 (Biomérieux), or the GP Campus anaerobic chamber (Jacomex). The anaerobic  
558 chamber was filled with a H<sub>2</sub>/CO<sub>2</sub>/N<sub>2</sub> (5%/5%/90%) mixture.

559

## 560 **Plasmids, primers, and DNA manipulation**

561 All plasmids and primers used in this study are listed in Supplementary Tables 4 and  
562 5, respectively. Cloning was performed using either NEBuilder HiFi DNA Assembly  
563 Master Mix (New England Biolabs) or standard restriction cloning methods.  
564 Chemically competent homemade *E. coli* DH5α or TOP10 cells<sup>66</sup> were used for  
565 transformation of cloning products or plasmids. *V. parvula* genomic DNA was  
566 extracted according to a protocol previously described for *Streptomyces* gDNA  
567 extraction<sup>67</sup> from stationary phase cultures in SK medium<sup>68</sup>. PCR reactions for cloning  
568 applications were carried out using Phusion HiFi Master Mix (Thermo Fisher Scientific)  
569 according to manufacturer's protocol. PCR reactions for the control of constructs were  
570 carried out using the DreamTaq Green MasterMix (Thermo Fisher Scientific) or the

571 EmeraldAmp GT PCR Master Mix (Takara Bio). Primers were obtained from Merck or  
572 Eurofins Genomics. PCR products were purified using the NucleoSpin Gel and PCR  
573 Clean-up kit (Macherey-Nagel). Restriction enzymes were of the FastDigest family of  
574 products (Thermo Fisher Scientific). Digestion products were isolated on agarose gels  
575 and purified with the NucleoSpin Gel and PCR Clean-up kit (Macherey-Nagel).  
576 Plasmid isolation was performed with NucleoSpin Plasmid kit (Macherey-Nagel).  
577 Sequence in silico manipulation was carried out using SnapGene (GSL Biotech,  
578 [www.snapgene.com](http://www.snapgene.com)) and Geneious (Dotmatics). Primers were designed with  
579 NEBuilder (New England Biolabs, [nebuilder.neb.com](http://nebuilder.neb.com)). Construct Sanger sequencing  
580 was performed by Eurofins ([eurofinsgenomics.eu](http://eurofinsgenomics.eu)).

581

## 582 **Construction of expression vectors**

583 For full length VpOmpM1 expression in *E. coli* we inserted the VpOmpM1 CDS without  
584 the signal peptide into the pB22 vector (adding *E. coli* TamB signal peptide and seven  
585 histidine residues to the N-terminus). Briefly, we amplified the VpOmpM1 fragment  
586 with the JW203/JW202 primer pair using *V. parvula* SKV38 gDNA as a template and  
587 cloned it into pB22 digested with XhoI/XbaI, yielding the pJW46 vector. Similarly, the  
588  $\beta$ -barrel portion of VpOmpM1 (pJW45) and FNLLGLLA\_00518 (pB22-00518\_21-200),  
589 and full-length FNLLGLLA\_00833 (pB22-00833) were cloned into pB22. The *ompM1*  
590 region coding for the stalk (residues 22-107) was amplified from *V. parvula* SKV38  
591 gDNA with the primer pair stalk\_F/R, digested with NcoI and XhoI, and cloned into  
592 pET28b yielding a C-terminal His<sub>6</sub> fusion. For the expression of full length VpOmpM1  
593 in *V. parvula*, we inserted the C-terminally His-tagged *ompM1* coding gene containing  
594 the native ribosome binding site into pRPF185 using the JW172/JW206 primer pair  
595 and *V. parvula* SKV38 gDNA as a template, yielding vector pJW48. The vector was

596 then transferred by conjugation into the  $\Delta ompM1-3$  *V. parvula* mutant strain as  
597 described previously (Witwinowski *et al.* 2022).

598

### 599 **Protein expression and purification in *E. coli***

600 *E. coli* C43(DE3)  $\Delta cyoABCD$  (Cyo complex deletion to improve purity) cells were  
601 transformed with a pB22 plasmid carrying either the full-length VpOmpM1 (pJW46),  
602 barrel-only VpOmpM1 (pJW45), barrel-only FNLLGLLA\_00518 (pB22-00518\_21-200)  
603 or full-length FNLLGLLA\_00833 (pB22-00833). After overnight incubation at 37°C,  
604 transformants were picked from Lysogeny Broth (LB)-ampicillin plates and used to  
605 inoculate a starter LB-ampicillin culture incubated at 37°C with shaking for 2 h. Flasks  
606 with 1 l LB were inoculated with 8-12 ml of the starter culture and incubated at 37°C,  
607 160 rpm until OD<sub>600</sub>~0.5-0.6. Protein expression was induced by supplementing the  
608 cultures with 0.1% arabinose, followed by a further 3-4 h incubation at 37°C with  
609 shaking. Cultures were harvested and cell pellets were stored at -20°C.

610 Cell pellets were thawed, resuspended in cold 20 mM Tris-HCl pH 8.0, 300 mM NaCl  
611 (TBS) and supplemented with DNase I. Cells were lysed by passing the cell  
612 suspension once through a cell disruptor (Constant Systems) at 23 kpsi. The lysate  
613 was clarified by centrifugation at 30,000g, 4°C for 30 min. The membranes were  
614 isolated from the clarified lysate by ultracentrifugation at 42,000 rpm (45 Ti rotor,  
615 Beckman), 4°C for 50 min. The membranes were solubilised in 2.5% Eluent  
616 (Millipore) in TBS for 1 h at 4°C. Insoluble material was pelleted by centrifugation at  
617 44,000g, 4°C for 30 min. The solubilised fraction was passed through a ~4 ml chelating  
618 sepharose column charged with Ni<sup>2+</sup> ions. The column was washed with 20 column  
619 volumes of TBS with 30 mM imidazole and 0.15% lauryldimethylamine oxide (LDAO),  
620 and bound protein was eluted with TBS supplemented with 200 mM imidazole and  
621 0.2% decyl maltoside (DM). The eluate was concentrated using an Amicon Ultra

622 filtration device (50 kDa cut-off membrane), loaded on a HiLoad Superdex 200 16/60  
623 column and eluted in 10 mM HEPES-NaOH pH 7.5, 100 mM NaCl, 0.12% DM.  
624 Fractions were analysed by SDS-PAGE, pooled, concentrated by filtration (100 kDa  
625 cut-off membrane) and flash-frozen in liquid nitrogen. Protein samples were stored at  
626 -80°C.

627

628 *E. coli* BL21 (DE3) cells were transformed with the pET28b-SLH\_22-107 plasmid for  
629 production of the VpOmpM1 stalk region. Expression cultures were set up as above,  
630 except kanamycin instead of ampicillin was used in all media, and protein expression  
631 was induced by adding 0.4 mM isopropyl  $\beta$ -D-1-thiogalactopyranoside instead of  
632 arabinose. Protein purification was performed as above, omitting the  
633 ultracentrifugation and solubilisation steps, and without detergents in buffers. A 10 kDa  
634 cut-off membrane was used for concentrating protein.

635 *E. coli* BL21 (DE3) cells were transformed with the pBAD24-EcOmpF plasmid for  
636 production of EcOmpF. Protein expression and purification was performed as for the  
637 pB22 constructs up to the membrane isolation stage. Inner membranes were  
638 selectively solubilised in 20 mM HEPES-NaOH pH 7.5 and 0.5 % (w/v) sodium lauroyl  
639 sarcosinate for 30 min at room temperature with stirring. The insoluble fraction  
640 containing the outer membranes was recovered by ultracentrifugation for 30 min at  
641 42,000 rpm (45 Ti rotor). The sarcosinate wash and ultracentrifugation steps were  
642 repeated once. Outer membranes were solubilised in 20 mM HEPES-NaOH pH 7.5,  
643 50 mM NaCl and 1.5% LDAO for 1 h at 4°C. The extract was clarified by  
644 ultracentrifugation and loaded on a 1 ml ResourceQ anion exchange column (Cytiva).  
645 The column was washed and eluted with a 0-500 mM NaCl gradient. Fractions  
646 containing EcOmpF were concentrated and subjected to size exclusion  
647 chromatography on a Superdex200 10/300 GL column (10 mM HEPES-NaOH pH 7.5,

648 100 mM NaCl, 0.05% LDAO). The protein was further purified on a MonoQ 5/50 GL  
649 anion exchange column (Cytiva), and detergent was exchanged to 0.12% DM via a  
650 final size exclusion chromatography run.

651

### 652 **Expression and purification of VpOmpM1 from *V. parvula***

653 15 l of *V. parvula* was grown overnight in anaerobic SK media containing 1.2% sodium  
654 lactate and supplemented with 700 µg/l sodium resazurin as an oxygen indicator.  
655 Briefly, media was mixed from sterile components, boiled to remove oxygen from the  
656 solution (until resazurin appeared colourless) and flushed for 15 minutes with N<sub>2</sub> to  
657 remove oxygen from the bottle head volume, before being sealed with a pierceable  
658 lid. Anaerobic bottles were inoculated from overnight starter cultures at an OD of 0.04  
659 and supplemented with 25 mg/l chloramphenicol and 250 µg/l anhydrotetracycline.  
660 Cultures were grown at 37°C overnight with 180 rpm agitation. Cells were harvested  
661 by centrifugation 8000 g for 10 minutes. Pellets were pooled to represent 1.5 l of  
662 original culture each and resuspended in 5 ml HEPES pH 7.4. 100 µl 3.5x10<sup>4</sup> U/ml  
663 benzonase and a small spatula of lysozyme was added and sample was incubated on  
664 ice for 15 minutes. Cells were lysed by two rounds of French press and the debris was  
665 pelleted by centrifugation for 90 minutes at 15,000 g. The supernatant was carefully  
666 transferred to an ultracentrifuge tube containing 2 ml of a 50% sucrose cushion and  
667 centrifuged for 4 hours at 35,000 g. The volume at the Sucrose supernatant interface  
668 was extracted, resuspended in 20 ml of HEPES pH 7.4 and pelleted at 35,000 g for 4  
669 hours. Pelleted membranes were frozen in liquid nitrogen and stored at -80°C.

670

671 *V. parvula* membrane solubilization and the protein purification procedure was the  
672 same as for VpOmpM1 expressed in *E. coli*, except that the flow-through from the  
673 chelating sepharose column was put through the column again due to poor binding of

674 protein of interest to the resin. The final size exclusion chromatography step was done  
675 on a Superdex 200 10/300 Increase column.

676

### 677 **Cryo-EM structure determination**

678 Purified VpOmpM1 from *E. coli* (11.6 mg/ml) or *V. parvula* (8 mg/ml) was applied to  
679 glow discharged Quantifoil 1.2/1.3 200 mesh holey carbon grids. The grids were  
680 immediately blotted and plunge-frozen in liquid ethane using a Vitrobot Mark IV  
681 (ThermoFisher Scientific) device operating at 4°C and 100% humidity. Data were  
682 collected on a FEI Glacios microscope operating at 200 kV using a Falcon 4 direct  
683 electron detector (ThermoFisher Scientific) at the University of York (Supplementary  
684 Table 1). A total of 4,284 and 6,505 movies with the *E. coli* and *V. parvula* samples,  
685 respectively, were recorded in electron event representation (EER) mode at 240,000  
686 magnification, corresponding to a pixel size of 0.574 Å.

687

688 All image processing was done in cryoSPARC v3.3.2<sup>69,70</sup>. Movies were motion  
689 corrected using patch motion correction, and CTF parameters were estimated using  
690 patch CTF estimation. For VpOmpM1 expressed in *E. coli*, 2D classes generated from  
691 manually picked particles were used for template-based picking. 838,051 particles  
692 were extracted in 600 pixel boxes and Fourier cropped to 300 pixel boxes  
693 corresponding to a pixel size of 1.148 Å. Three rounds of 2D classification were used  
694 to discard bad particles, followed by generation of an ab initio 3D map using a  
695 stochastic gradient descent algorithm with 3 classes and 145,518 particles. All three  
696 classes were very similar, and a single class was used as a template in non-uniform  
697 refinement with the whole particle stack either without symmetry (C1) or with C3  
698 symmetry enforced, with per-particle defocus and CTF group parameter (beam tilt and  
699 trefoil) refinement enabled. The 145,518 particle stack was subjected to



700 heterogeneous refinements against the C1 map from non-uniform refinement and  
701 three decoy templates, or against the C3 map and the same three decoy templates.  
702 Particles were re-extracted in 600 pixel boxes with a pixel size of 0.574 Å. The final  
703 particle stacks (96,280 particles for the C1 map; 119,001 particles for the C3 map)  
704 were subjected to non-uniform refinement either with C1 or C3 symmetry enforced.  
705 The native VpOmpM1 dataset was processed similarly, except that two rounds of 2D  
706 classification were performed, four classes were used to make the ab initio map, four  
707 decoy templates were used in heterogeneous refinement, and the pixel size remained  
708 1.148 Å throughout.

709

710 The final B-factor-sharpened maps from non-uniform refinement were used to build  
711 the models. A de novo model was built into the C3 map using Buccaneer<sup>71</sup>, followed  
712 by cycles of manual building in COOT<sup>72</sup> and real space refinement in Phenix<sup>73</sup>. The  
713 C3 model was then docked into the C1 map, manually extended in COOT and real-  
714 space-refined. The model built into the C1 map of VpOmpM1 expressed in *E. coli* was  
715 docked into the native VpOmpM1 C1 map, manually adjusted in COOT and real-  
716 space-refined.

717

### 718 **Crystal structure determination**

719 The purified VpOmpM1 stalk construct was concentrated to ~20 mg/ml. Sitting drop  
720 vapour diffusion crystallisation screens were set up using a Mosquito robot (SPT  
721 Labtech). Crystals grew in 0.1 M citric acid pH 3.5, 2.0 M ammonium sulphate at 20°C.  
722 Crystals were cryo-protected in mother liquor supplemented with ~20% PEG400 and  
723 flash-cooled in liquid nitrogen. Diffraction data were collected at the synchrotron  
724 beamline I03 at Diamond Light Source (UK) at a temperature of 100 K (Supplementary  
725 Table 2). The dataset was processed with XIA2<sup>74</sup>, scaled with Aimless<sup>75</sup>, and the

726 space group was confirmed with Pointless<sup>76</sup>. Data quality was evaluated in Xtriage<sup>73</sup>.  
727 Arcimboldo<sup>77</sup>, part of the CCP4i2 suite<sup>78</sup>, was used for ab initio phasing. The initial  
728 model was extended by Buccaneer and subjected to cycles of manual building and  
729 refinement in Phenix<sup>73</sup> (Supplementary Table 2).

730

## 731 **Computational Modelling & Simulation**

732 **VpOmpM1 model building.** Computational models of trimeric full-length VpOmpM1  
733 were predicted using AlphaFold2<sup>37</sup>. Two unique structures were predicted: one with  
734 an extended coiled-coil stalk, and one with a compacted stalk region (Supplementary  
735 Figure 4). The AlphaFold2 predicted structure with the extended stalk displays no tilt  
736 of the stalk relative to the z-axis, in contrast to the reconstructed cryo-EM density. To  
737 generate a full-length VpOmpM1 structure with a tilted stalk consistent with the  
738 experimental data, the extended stalk of the AlphaFold2 prediction was fit into the low  
739 resolution cryo-EM density and grafted to the well-resolved experimental structure  
740 using ChimeraX<sup>79</sup>.

741

742 **System generation.** Three different models of VpOmpM1 were used to build protein-  
743 membrane systems: full-length VpOmpM1 with the grafted extended stalk; full-length  
744 VpOmpM1 with the compacted stalk (AlphaFold2 predicted structure); and truncated  
745 VpOmpM1 from the reconstructed cryo-EM density (from residue L100 onwards). For  
746 each protein model, the  $\beta$ -barrel domain of the VpOmpM1 trimer was embedded in a  
747 model *Escherichia coli* outer membrane using the CHARMM-GUI Membrane Builder  
748 module<sup>80</sup>. The inner leaflet consisted of 90% 1-palmitoyl-2-oleoyl-sn-glycero-3-  
749 phosphoethanolamine (POPE), 5% 1-palmitoyl-2-oleoyl-sn-glycero-3-  
750 phosphoglycerol (POPG), and 5% 1',3'-bis[1-palmitoyl-2-oleoyl-sn-glycero-3-  
751 phospho]glycerol (cardiolipin), and the outer leaflet consisted of 100% LPS (R1 core,

752 5 x O1 O-antigen units). This asymmetric bilayer system was solvated in 150 mM KCl,  
753 with additional calcium ions to neutralise the LPS headgroups (~115 mM in each  
754 system).

755

756 **Atomistic Molecular Dynamics Simulations.** All simulations used the  
757 CHARMM36m forcefield<sup>81</sup> with the TIP3P water model<sup>82</sup>. Simulations were carried out  
758 using the GROMACS simulation package (version 2021.2)<sup>83</sup>. For all simulation steps,  
759 a cut-off of 1.2 nm was applied to Lennard-Jones interactions and short-range  
760 electrostatics using the potential shift Verlet scheme. Long-range electrostatics were  
761 treated using the particle mesh-Ewald (PME) method<sup>84</sup>. Atoms were constrained using  
762 the LINCS algorithm to allow the use of a 2 fs timestep in NPT equilibration and  
763 production phases<sup>85</sup>. The three systems were energy minimised in 5000 steps using  
764 the steepest descent method<sup>86</sup>. The subsequent systems were equilibrated in six  
765 phases (two NVT and four NPT phases) in which the protein and lipid headgroups  
766 were subjected to position restraints with varying force constants (Supplementary  
767 Table 6). All equilibration phases used the Berendsen thermostat<sup>87</sup> to bring the system  
768 to 303.15 K (coupling constant of 1.0 ps). NPT equilibration phases used semi-  
769 isotropic Berendsen pressure coupling scheme<sup>87</sup> to equilibrate with a pressure bath of  
770 1 bar ( $\tau_p = 5.0$  ps, compressibility of  $4.5 \times 10^{-5}$  bar<sup>-1</sup>).

771

772 These equilibrated systems were then simulated. The extended stalk system was  
773 simulated in duplicate for 1  $\mu$ s, and the compacted and truncated stalk systems were  
774 each simulated as a single replicate for 1  $\mu$ s. These production simulations utilised the  
775 Nosé-Hoover thermostat<sup>88</sup> (coupling constant of 1.0 ps) and the semi-isotropic  
776 Parrinello-Rahman barostat<sup>89</sup> ( $\tau_p = 5.0$  ps, compressibility of  $4.5 \times 10^{-5}$  bar<sup>-1</sup>).  
777 Trajectories were analysed using GROMACS tools and MDAnalysis utilities<sup>90,91</sup>.

778 Molecular graphics and supplementary animations were generated using VMD  
779 (version 1.9.4a51)<sup>92</sup> and Molywood (version 0.22)<sup>93</sup>.

780

### 781 **Bilayer electrophysiology**

782 Electrophysiology measurements were carried out in a custom-made cuvette at the  
783 centre of which was suspended a 25  $\mu\text{m}$  thick Teflon film (Goodfellow Cambridge Ltd)  
784 with a 80-100  $\mu\text{m}$  aperture and 1.25 ml electrode chambers either side of the film. The  
785 Teflon film aperture was made lipophilic by 'painting' with 1.5-3  $\mu\text{l}$  1% hexadecane in  
786 hexane solution on both sides, and the hexane was allowed to evaporate for at least  
787 30 min. Electrophysiology buffer (10 mM HEPES-KOH pH 7.5, 1 M KCl) was added to  
788 both cuvette chambers, and 3  $\mu\text{l}$  of 5 mg/ml 1,2-diphytanoyl-sn-glycero-3-  
789 phosphocholine (DPhPC) dissolved in *n*-pentane was added. The *n*-pentane was left  
790 to evaporate for at least 5 min. DPhPC bilayers were formed using the method of  
791 Montal and Mueller<sup>94</sup>. Pure, concentrated protein (7-15 mg/ml) was serially diluted in  
792 1% Genapol X-100 (Sigma). 0.3-0.5  $\mu\text{l}$  of diluted protein was added to the *cis* (ground  
793 side) chamber, and diluted with electrophysiology buffer as required to promote  
794 protein insertion into the bilayer. Protein insertion events were detected as sudden  
795 jumps in current in constant-voltage mode. All measurements were carried out using  
796 Ag/AgCl pellet electrodes attached to an Axopatch 200B amplifier headstage, and a  
797 Digidata 1440A digitiser. The cuvette and headstage were enclosed in a custom-made  
798 Faraday shield during recording. Clampex software was used for recording. Clampfit  
799 software was used to analyse data.

800

### 801 **Liposome swelling assays**

802 Liposome swelling assays were carried out using the method of Nikaido and  
803 Rosenberg<sup>95</sup> with modifications. Lipid solution (4 mg/ml phosphatidylcholine and 0.46

804 mg/ml dihexadecyl phosphate in chloroform) was dried under an air stream, and  
805 completely dried under vacuum for at least 2 h. 80  $\mu$ l of lipid solution was used per  
806 condition, *i.e.* per protein to be reconstituted. The dried lipids were resuspended in  
807 100  $\mu$ l deionised water per condition. Equimolar amounts of protein were added to the  
808 resuspended lipid so that the total protein quantity was 15-30  $\mu$ g, followed by  
809 immediate vortexing. All conditions were supplemented with DM containing buffer to  
810 ensure that equal amounts of detergent were present in all samples. DM containing  
811 buffer was added to control liposomes. Solutions were sonicated in a water bath for 1-  
812 1.5 min until translucent, and dried under vacuum overnight. The following day the  
813 proteoliposomes were rehydrated in 200  $\mu$ l 10 mM HEPES-NaOH pH 7.5 and 12 mM  
814 stachyose per condition for 1-2 h at room temperature. Control liposomes were used  
815 to determine the concentration of each substrate that is isosmotic to the intraliposomal  
816 milieu (*i.e.* there is no swelling of the control liposomes), usually between 7.5 and 15  
817 mM substrate in 10 mM HEPES-NaOH pH 7.5. Substrate concentrations used can be  
818 found in Supplementary Table 7. The decrease in  $A_{400}$  due to liposome swelling was  
819 measured after adding 200  $\mu$ l of the substrate solution to 15  $\mu$ l of the proteoliposome  
820 suspension. Readings were taken on a Perkin Elmer Lambda 35 spectrophotometer  
821 in 1 s intervals for 30 s. A line was fit to the absorbance data corresponding to the  
822 linear phase of swelling (2-15 s), and the slope of the line was recorded as the swelling  
823 rate. Control liposome swelling rates were subtracted from all proteoliposome swelling  
824 rates. All data were normalized to EcOmpF-containing liposome swelling in the  
825 presence of arabinose.

826

827 **Data availability**

828 Electron microscopy maps have been deposited in the Electron Microscopy Data Bank  
829 with the accession codes EMD-16328 (VpOmpM1 from *E. coli* in C1), EMD-16333  
830 (VpOmpM1 from *E. coli* in C3) and EMD-16332 (VpOmpM1 from *V. parvula* in C1).  
831 Models built into the cryo-EM maps have been deposited in the Protein Data Bank  
832 under accession codes 8BYM (VpOmpM1 from *E. coli* in C1), 8BYT (VpOmpM1 from  
833 *E. coli* in C3) and 8BYS (VpOmpM1 from *V. parvula* in C1). The structure factors and  
834 atomic coordinates for the VpOmpM1 stalk crystal structure have been deposited in  
835 the Protein Data Bank under accession code 8BZ2. Other data presented in this paper,  
836 constructs and strains are available on reasonable request.

837

## 838 **Acknowledgements**

839 We thank the University of York (UK) electron cryo-microscopy facility for access to  
840 instrumentation and support. We acknowledge the Diamond Light Source for I03  
841 beamline access (proposal mx-24948) and support. We thank Arnaud Baslé for  
842 collecting X-ray data, maintaining the Newcastle Structural Biology Laboratory, and  
843 computing support. We thank David Staunton (University of Oxford) for carrying out  
844 the dynamic scanning calorimetry experiments. This work was supported by a  
845 Wellcome Trust Investigator award (214222/Z/18/Z) to B.v.d.B., providing salary  
846 support to A.S. and Y.Z. C.B., S.G., J.W., and R.E.S. were supported by funding from  
847 the French National Research Agency (ANR) (no. Fir-OM ANR-16-CE12-0010), the  
848 Institut Pasteur Programmes Transversaux de Recherche (no. PTR 39-16), and the  
849 French government Investissement d'Avenir Program, Laboratoire d'Excellence  
850 Integrative Biology of Emerging Infectious Diseases (grant no. ANR-10-LABX-62-  
851 IBEID). We acknowledge the use of the IRIDIS High Performance Computing Facility,  
852 and associated support services at the University of Southampton, in the completion  
853 of this work. K.E.N. was supported by a Ph.D. Studentship from the Engineering and

854 Physical Sciences Research Council (Project Number: 2446840), and S.K. by an  
855 EPSRC established Career Fellowship (EPSRC grant no. EP/V030779/1).

856

## 857 **Author contributions**

858 A.S. made constructs, purified proteins, determined cryo-EM and crystal structures,  
859 carried out functional assays, and wrote the manuscript with input from all authors.

860 Y.Z. purified proteins and carried out functional assays. K.E.N. performed simulations,  
861 supervised by S.K. J.W. made constructs and strains and prepared the dataset for

862 ConSurf analysis. R.E.S. grew *V. parvula*, prepared membrane pellets, and isolated  
863 sacculi. S.P.B. collected preliminary electrophysiology data. A.B. collected X-ray

864 diffraction data and managed the Newcastle Structural Biology Laboratory. B.v.d.B.

865 made constructs, purified and crystallised proteins. S.G., C.B. and B.v.d.B. conceived  
866 and supervised the project.

867

## 868 **Ethics declarations**

869 The authors declare no competing interests.

870

## 871 **References**

- 872 1. Silhavy, T. J., Ruiz, N. & Kahne, D. Advances in understanding bacterial outer-  
873 membrane biogenesis. *Nat. Rev. Microbiol.* 2006 41 4, 57–66 (2006).
- 874 2. Sun, J., Rutherford, S. T., Silhavy, T. J. & Huang, K. C. Physical properties of  
875 the bacterial outer membrane. *Nat. Rev. Microbiol.* 20, 236–248 (2022).
- 876 3. Bladen, H. A. & Mergenhagen, S. E. Ultrastructure of *Veillonella* and  
877 morphological correlation of an outer membrane with particles associated with  
878 endotoxic activity. *J. Bacteriol.* 88, 1482 (1964).
- 879 4. Rojas, E. R. *et al.* The outer membrane is an essential load-bearing element in  
880 Gram-negative bacteria. *Nature* 559, 617–621 (2018).
- 881 5. Braun, V. & Rehn, K. Chemical Characterization, Spatial Distribution and  
882 Function of a Lipoprotein (Murein-Lipoprotein) of the *E. coli* Cell Wall. *Eur. J.*  
883 *Biochem.* 10, 426–438 (1969).
- 884 6. Braun, V. Covalent lipoprotein from the outer membrane of *Escherichia coli*.  
885 *Biochim. Biophys. Acta - Rev. Biomembr.* 415, 335–377 (1975).
- 886 7. Cascales, E., Bernadac, A., Gavioli, M., Lazzaroni, J. C. & Lloubes, R. Pal

- 887 lipoprotein of *Escherichia coli* plays a major role in outer membrane integrity. *J.*  
888 *Bacteriol.* **184**, 754–759 (2002).
- 889 8. Bouveret, E., Bénédicti, H., Rigal, A., Loret, E. & Lazdunski, C. In vitro  
890 characterization of peptidoglycan-associated lipoprotein (PAL)- peptidoglycan  
891 and PAL-TolB interactions. *J. Bacteriol.* **181**, 6306–6311 (1999).
- 892 9. Parsons, L. M., Lin, F. & Orban, J. Peptidoglycan recognition by Pal, an outer  
893 membrane lipoprotein. *Biochemistry* **45**, 2122–2128 (2006).
- 894 10. Park, J. S. *et al.* Mechanism of anchoring of OmpA protein to the cell wall  
895 peptidoglycan of the gram-negative bacterial outer membrane. *FASEB J.* **26**,  
896 219–228 (2012).
- 897 11. Samsudin, F., Boags, A., Piggot, T. J. & Khalid, S. Braun's Lipoprotein  
898 Facilitates OmpA Interaction with the *Escherichia coli* Cell Wall. *Biophys. J.*  
899 **113**, 1496–1504 (2017).
- 900 12. Sonntag, I., Schwarz, H., Hirota, Y. & Henning, U. Cell envelope and shape of  
901 *Escherichia coli*: multiple mutants missing the outer membrane lipoprotein and  
902 other major outer membrane proteins. *J. Bacteriol.* **136**, 280 (1978).
- 903 13. Suzuki, H. *et al.* Murein-lipoprotein of *Escherichia coli*: a protein involved in the  
904 stabilization of bacterial cell envelope. *Mol. Gen. Genet.* **167**, 1–9 (1978).
- 905 14. Bernadac, A., Gavioli, M., Lazzaroni, J. C., Raina, S. & Lloubès, R.  
906 *Escherichia coli tol-pal* mutants form outer membrane vesicles. *J. Bacteriol.*  
907 **180**, 4872–4878 (1998).
- 908 15. Wang, Y. The Function of OmpA in *Escherichia coli*. *Biochem. Biophys. Res.*  
909 *Commun.* **292**, 396–401 (2002).
- 910 16. Witwinowski, J. *et al.* An ancient divide in outer membrane tethering systems  
911 in bacteria suggests a mechanism for the diderm-to-monoderm transition. *Nat.*  
912 *Microbiol.* **7**, 411–422 (2022).
- 913 17. Kalmokoff, M. L. *et al.* Physical and genetic characterization of an outer-  
914 membrane protein (OmpM1) containing an N-terminal S-layer-like homology  
915 domain from the phylogenetically Gram-positive gut anaerobe *Mitsuokella*  
916 *multacida*. *Anaerobe* **15**, 74–81 (2009).
- 917 18. Kojima, S. *et al.* Cadaverine covalently linked to peptidoglycan is required for  
918 interaction between the peptidoglycan and the periplasm-exposed S-layer-  
919 homologous domain of major outer membrane protein Mep45 in *Selenomonas*  
920 *ruminantium*. *J. Bacteriol.* **192**, 5953–5961 (2010).
- 921 19. Kojima, S. *et al.* Peptidoglycan-associated outer membrane protein Mep45 of  
922 rumen anaerobe *Selenomonas ruminantium* forms a non-specific diffusion  
923 pore via its C-terminal transmembrane domain. *Biosci. Biotechnol. Biochem.*  
924 **80**, 1954 (2016).
- 925 20. Kowata, H., Tochigi, S., Takahashi, H. & Kojima, S. Outer Membrane  
926 Permeability of Cyanobacterium *Synechocystis* sp. Strain PCC 6803: Studies  
927 of Passive Diffusion of Small Organic Nutrients Reveal the Absence of  
928 Classical Porins and Intrinsically Low Permeability. *J. Bacteriol.* **199**, (2017).
- 929 21. Olabarría, C., Carrascosa, J. L., De Pedro, M. A. & Berenguer, J. A conserved  
930 motif in S-layer proteins is involved in peptidoglycan binding in *Thermus*  
931 *thermophilus*. *J. Bacteriol.* **178**, 4765 (1996).
- 932 22. Cava, F., De Pedro, M. A., Schwarz, H., Henne, A. & Berenguer, J. Binding to  
933 pyruvylated compounds as an ancestral mechanism to anchor the outer  
934 envelope in primitive bacteria. *Mol. Microbiol.* **52**, 677–690 (2004).
- 935 23. Kojima, S. & Okumura, Y. Outer membrane-deprived cyanobacteria liberate  
936 periplasmic and thylakoid luminal components that support the growth of  
937 heterotrophs. *bioRxiv* 2020.03.24.006684 (2020).  
938 doi:10.1101/2020.03.24.006684



- 939 24. Kamio, Y., Itoh, Y. & Terawaki, Y. Chemical structure of peptidoglycan in  
940 *Selenomonas ruminantium*: Cadaverine links covalently to the D-glutamic acid  
941 residue of peptidoglycan. *J. Bacteriol.* **146**, 49–53 (1981).
- 942 25. Kamio, Y. & Nakamura, K. Putrescine and cadaverine are constituents of  
943 peptidoglycan in *Veillonella alcalescens* and *Veillonella parvula*. *J. Bacteriol.*  
944 **169**, 2881–2884 (1987).
- 945 26. Nikaido, H. & Vaara, M. Molecular basis of bacterial outer membrane  
946 permeability. *Microbiol. Rev.* **49**, 1 (1985).
- 947 27. Nikaido, H. Molecular basis of bacterial outer membrane permeability revisited.  
948 *Microbiol. Mol. Biol. Rev.* **67**, 593–656 (2003).
- 949 28. Poppleton, D. I. *et al.* Outer Membrane Proteome of *Veillonella parvula*: A  
950 Diderm Firmicute of the Human Microbiome. *Front. Microbiol.* **8**, (2017).
- 951 29. von K ugelgen, A., van Dorst, S., Alva, V. & Bharat, T. A. M. A multidomain  
952 connector links the outer membrane and cell wall in phylogenetically deep-  
953 branching bacteria. *Proc. Natl. Acad. Sci. U. S. A.* **119**, e2203156119 (2022).
- 954 30. Farci, D. *et al.* The cryo-EM structure of the S-layer deinoxanthin-binding  
955 complex of *Deinococcus radiodurans* informs properties of its environmental  
956 interactions. *J. Biol. Chem.* **298**, (2022).
- 957 31. Rothfuss, H., Lara, J. C., Schmid, A. K. & Lidstrom, M. E. Involvement of the  
958 S-layer proteins Hpi and SlpA in the maintenance of cell envelope integrity in  
959 *Deinococcus radiodurans* R1. *Microbiology* **152**, 2779–2787 (2006).
- 960 32. Farci, D., Haniewicz, P. & Piano, D. The structured organization of  
961 *Deinococcus radiodurans*’ cell envelope. *Proc. Natl. Acad. Sci. U. S. A.* **119**,  
962 e2209111119 (2022).
- 963 33. von K ugelgen, A. *et al.* Title Interdigitated immunoglobulin arrays form the  
964 hyperstable surface layer of the extremophilic bacterium *Deinococcus*  
965 *radiodurans*. *bioRxiv* 2022.09.15.508085 (2022).  
966 doi:10.1101/2022.09.15.508085
- 967 34. Cowan, S. W. *et al.* Crystal structures explain functional properties of two *E.*  
968 *coli* porins. *Nature* **358**, 727–733 (1992).
- 969 35. Basl e, A., Rummel, G., Storici, P., Rosenbusch, J. P. & Schirmer, T. Crystal  
970 structure of osmoporin OmpC from *E. coli* at 2.0  . *J. Mol. Biol.* **362**, 933–942  
971 (2006).
- 972 36. Xie, Y. *et al.* IBS 2.0: an upgraded illustrator for the visualization of biological  
973 sequences. *Nucleic Acids Res.* **50**, W420–W426 (2022).
- 974 37. Jumper, J. *et al.* Highly accurate protein structure prediction with AlphaFold.  
975 *Nat.* 2021 5967873 **596**, 583–589 (2021).
- 976 38. Mesnage, S. *et al.* Bacterial SLH domain proteins are non-covalently anchored  
977 to the cell surface via a conserved mechanism involving wall polysaccharide  
978 pyruvylation. *EMBO J.* **19**, 4473–4484 (2000).
- 979 39. Kern, J. *et al.* Structure of Surface Layer Homology (SLH) Domains from  
980 *Bacillus anthracis* Surface Array Protein. *J. Biol. Chem.* **286**, 26042–26049  
981 (2011).
- 982 40. Blackler, R. J. *et al.* Structural basis of cell wall anchoring by SLH domains in  
983 *Paenibacillus alvei*. *Nat. Commun.* 2018 91 **9**, 1–11 (2018).
- 984 41. Sychantha, D. *et al.* Molecular Basis for the Attachment of S-Layer Proteins to  
985 the Cell Wall of *Bacillus anthracis*. *Biochemistry* **57**, 1949–1953 (2018).
- 986 42. Legg, M. S. G. *et al.* The S-layer homology domains of *Paenibacillus alvei*  
987 surface protein SpaA bind to cell wall polysaccharide through the terminal  
988 monosaccharide residue. *J. Biol. Chem.* **298**, 101745 (2022).
- 989 43. Vassylyev, D. G., Tomitori, H., Kashiwagi, K., Morikawa, K. & Igarashi, K.  
990 Crystal Structure and Mutational Analysis of the *Escherichia coli* Putrescine

- 991 Receptor: STRUCTURAL BASIS FOR SUBSTRATE SPECIFICITY. *J. Biol.*  
992 *Chem.* **273**, 17604–17609 (1998).
- 993 44. Wu, D. *et al.* Structural Basis of Substrate Binding Specificity Revealed by the  
994 Crystal Structures of Polyamine Receptors SpuD and SpuE from  
995 *Pseudomonas aeruginosa*. *J. Mol. Biol.* **416**, 697–712 (2012).
- 996 45. Bale, S. *et al.* Structural basis for putrescine activation of human S-  
997 adenosylmethionine decarboxylase. *Biochemistry* **47**, 13404–13417 (2008).
- 998 46. Sagong, H. Y. *et al.* Crystal Structure and Pyridoxal 5-Phosphate Binding  
999 Property of Lysine Decarboxylase from *Selenomonas ruminantium*. *PLoS One*  
1000 **11**, e0166667 (2016).
- 1001 47. Kröger, P., Shanmugaratnam, S., Ferruz, N., Schweimer, K. & Höcker, B. A  
1002 comprehensive binding study illustrates ligand recognition in the periplasmic  
1003 binding protein PotF. *Structure* **29**, 433-443.e4 (2021).
- 1004 48. Ashkenazy, H. *et al.* ConSurf 2016: an improved methodology to estimate and  
1005 visualize evolutionary conservation in macromolecules. *Nucleic Acids Res.* **44**,  
1006 W344–W350 (2016).
- 1007 49. Holm, L. Dali server: structural unification of protein families. *Nucleic Acids*  
1008 *Res.* **50**, W210–W215 (2022).
- 1009 50. Karshikoff, A., Spassov, V., Cowan, S. W., Ladenstein, R. & Schirmer, T.  
1010 Electrostatic Properties of Two Porin Channels from *Escherichia coli*. *J. Mol.*  
1011 *Biol.* **240**, 372–384 (1994).
- 1012 51. Schirmer, T. & Phale, P. S. Brownian dynamics simulation of ion flow through  
1013 porin channels. *J. Mol. Biol.* **294**, 1159–1167 (1999).
- 1014 52. Smart, O. S., Neduvellil, J. G., Wang, X., Wallace, B. A. & Sansom, M. S. P.  
1015 HOLE: A program for the analysis of the pore dimensions of ion channel  
1016 structural models. *J. Mol. Graph.* **14**, 354–360 (1996).
- 1017 53. Nestorovich, E. M., Rostovtseva, T. K. & Bezrukov, S. M. Residue Ionization  
1018 and Ion Transport through OmpF Channels. *Biophys. J.* **85**, 3718–3729  
1019 (2003).
- 1020 54. Schmitt, E. K., Vrouwenraets, M. & Steinem, C. Channel activity of OmpF  
1021 monitored in nano-BLMs. *Biophys. J.* **91**, 2163–2171 (2006).
- 1022 55. Efremov, R. G. & Sazanov, L. A. Structure of *Escherichia coli* OmpF porin from  
1023 lipidic mesophase. *J. Struct. Biol.* **178**, 311–318 (2012).
- 1024 56. Vandeputte-Rutten, L. *et al.* Crystal structure of the outer membrane protease  
1025 OmpT from *Escherichia coli* suggests a novel catalytic site. *EMBO J.* **20**,  
1026 5033–5039 (2001).
- 1027 57. Eren, E., Murphy, M., Goguen, J. & van den Berg, B. An Active Site Water  
1028 Network in the Plasminogen Activator Pla from *Yersinia pestis*. *Structure* **18**,  
1029 809–818 (2010).
- 1030 58. Hong, H., Patel, D. R., Tamm, L. K. & Van Den Berg, B. The Outer Membrane  
1031 Protein OmpW Forms an Eight-stranded  $\beta$ -Barrel with a Hydrophobic Channel.  
1032 *J. Biol. Chem.* **281**, 7568–7577 (2006).
- 1033 59. Hong, H., Szabo, G. & Tamm, L. K. Electrostatic couplings in OmpA ion-  
1034 channel gating suggest a mechanism for pore opening. *Nat. Chem. Biol.* **2006**  
1035 **211** **2**, 627–635 (2006).
- 1036 60. Mader, C., Huber, C., Moll, D., Sleytr, U. B. & Sára, M. Interaction of the  
1037 Crystalline Bacterial Cell Surface Layer Protein SbsB and the Secondary Cell  
1038 Wall Polymer of *Geobacillus stearothermophilus* PV72 Assessed by Real-Time  
1039 Surface Plasmon Resonance Biosensor Technology. *J. Bacteriol.* **186**, 1758–  
1040 1768 (2004).
- 1041 61. Janesch, B., Messner, P. & Schäffer, C. Are the surface layer homology  
1042 domains essential for cell surface display and glycosylation of the S-layer

- 1043 protein from *Paenibacillus alvei* CCM 2051T? *J. Bacteriol.* **195**, 565–575  
1044 (2013).
- 1045 62. Taib, N. *et al.* Genome-wide analysis of the Firmicutes illuminates the  
1046 diderm/monoderm transition. *Nat. Ecol. Evol.* **4**, 1661–1672 (2020).
- 1047 63. Green, M. R. & Sambrook, J. *Molecular Cloning: A Laboratory Manual (Fourth*  
1048 *Edition)*. (Cold Spring Harbor Laboratory Press, 2012).
- 1049 64. Knapp, S. *et al.* Natural Competence Is Common among Clinical Isolates of  
1050 *Veillonella parvula* and Is Useful for Genetic Manipulation of This Key Member  
1051 of the Oral Microbiome. *Front. Cell. Infect. Microbiol.* **7**, (2017).
- 1052 65. Béchon, N. *et al.* Autotransporters Drive Biofilm Formation and  
1053 Autoaggregation in the Diderm Firmicute *Veillonella parvula*. *J. Bacteriol.* **202**,  
1054 (2020).
- 1055 66. Inoue, H., Nojima, H. & Okayama, H. High efficiency transformation of  
1056 *Escherichia coli* with plasmids. *Gene* **96**, 23–28 (1990).
- 1057 67. Jacques, I. B. *et al.* Analysis of 51 cyclodipeptide synthases reveals the basis  
1058 for substrate specificity. *Nat. Chem. Biol.* **2015 119 11**, 721–727 (2015).
- 1059 68. Knapp, S. *et al.* Natural Competence Is Common among Clinical Isolates of  
1060 *Veillonella parvula* and Is Useful for Genetic Manipulation of This Key Member  
1061 of the Oral Microbiome. *Front. Cell. Infect. Microbiol.* **7**, 139 (2017).
- 1062 69. Punjani, A., Rubinstein, J. L., Fleet, D. J. & Brubaker, M. A. cryoSPARC:  
1063 algorithms for rapid unsupervised cryo-EM structure determination. *Nat.*  
1064 *Methods* **2017 143 14**, 290–296 (2017).
- 1065 70. Punjani, A., Zhang, H. & Fleet, D. J. Non-uniform refinement: adaptive  
1066 regularization improves single-particle cryo-EM reconstruction. *Nat. Methods*  
1067 **2020 1712 17**, 1214–1221 (2020).
- 1068 71. Hoh, S. W., Burnley, T. & Cowtan, K. Current approaches for automated model  
1069 building into cryo-EM maps using Buccaneer with CCP-EM. *Acta Crystallogr.*  
1070 *Sect. D, Struct. Biol.* **76**, 531–541 (2020).
- 1071 72. Emsley, P., Lohkamp, B., Scott, W. G. & Cowtan, K. Features and  
1072 development of Coot. *Acta Crystallogr. D. Biol. Crystallogr.* **66**, 486–501  
1073 (2010).
- 1074 73. Liebschner, D. *et al.* Macromolecular structure determination using X-rays,  
1075 neutrons and electrons: recent developments in Phenix. *Acta Crystallogr. Sect.*  
1076 *D, Struct. Biol.* **75**, 861–877 (2019).
- 1077 74. Winter, G. Xia2: An expert system for macromolecular crystallography data  
1078 reduction. *J. Appl. Crystallogr.* **43**, 186–190 (2010).
- 1079 75. Evans, P. R. & Murshudov, G. N. How good are my data and what is the  
1080 resolution? *Acta Crystallogr. Sect. D Biol. Crystallogr.* **69**, 1204–1214 (2013).
- 1081 76. Evans, P. Scaling and assessment of data quality. in *Acta Crystallographica*  
1082 *Section D: Biological Crystallography* **62**, 72–82 (International Union of  
1083 Crystallography, 2006).
- 1084 77. Rodríguez, D. D. *et al.* Crystallographic ab initio protein structure solution  
1085 below atomic resolution. *Nat. Methods* **2009 69 6**, 651–653 (2009).
- 1086 78. Potterton, L. *et al.* CCP4i2: the new graphical user interface to the CCP4  
1087 program suite. *Acta Crystallogr. Sect. D, Struct. Biol.* **74**, 68 (2018).
- 1088 79. Pettersen, E. F. *et al.* UCSF ChimeraX: Structure visualization for researchers,  
1089 educators, and developers. *Protein Sci.* **30**, 70–82 (2021).
- 1090 80. Lee, J. *et al.* CHARMM-GUI Membrane Builder for Complex Biological  
1091 Membrane Simulations with Glycolipids and Lipoglycans. *J. Chem. Theory*  
1092 *Comput.* **15**, 775–786 (2019).
- 1093 81. Huang, J. & Mackerell, A. D. CHARMM36 all-atom additive protein force field:  
1094 Validation based on comparison to NMR data. *J. Comput. Chem.* **34**, 2135–

- 1095 2145 (2013).
- 1096 82. Jorgensen, W. L., Chandrasekhar, J., Madura, J. D., Impey, R. W. & Klein, M.  
1097 L. Comparison of simple potential functions for simulating liquid water. *J.*  
1098 *Chem. Phys.* **79**, 926 (1998).
- 1099 83. Van Der Spoel, D. *et al.* GROMACS: Fast, flexible, and free. *Journal of*  
1100 *Computational Chemistry* **26**, 1701–1718 (2005).
- 1101 84. Essmann, U. *et al.* A smooth particle mesh Ewald method. *J. Chem. Phys.*  
1102 **103**, 8577–8593 (1995).
- 1103 85. Hess, B., Bekker, H., Berendsen, H. J. C. & Fraaije, J. G. E. M. LINCS: A  
1104 Linear Constraint Solver for molecular simulations. *J. Comput. Chem.* **18**,  
1105 1463–1472 (1997).
- 1106 86. Goldstein, A. A. On Steepest Descent. *J. Soc. Ind. Appl. Math. Ser. A Control*  
1107 **3**, 147–151 (1965).
- 1108 87. Berendsen, H. J. C., Postma, J. P. M., Van Gunsteren, W. F., Dinola, A. &  
1109 Haak, J. R. Molecular dynamics with coupling to an external bath. *J. Chem.*  
1110 *Phys.* **81**, 3684–3690 (1984).
- 1111 88. Nosé, S. A unified formulation of the constant temperature molecular dynamics  
1112 methods. *J. Chem. Phys.* **81**, 511–519 (1984).
- 1113 89. Parrinello, M. & Rahman, A. Polymorphic transitions in single crystals: A new  
1114 molecular dynamics method. *J. Appl. Phys.* **52**, 7182 (1998).
- 1115 90. Michaud-Agrawal, N., Denning, E. J., Woolf, T. B. & Beckstein, O. MDAAnalysis:  
1116 A toolkit for the analysis of molecular dynamics simulations. *J. Comput. Chem.*  
1117 **32**, 2319–2327 (2011).
- 1118 91. Gowers, R. *et al.* MDAAnalysis: A Python Package for the Rapid Analysis of  
1119 Molecular Dynamics Simulations. in *Proceedings of the 15th Python in Science*  
1120 *Conference* 98–105 (SciPy, 2016). doi:10.25080/Majora-629e541a-00e
- 1121 92. Humphrey, W., Dalke, A. & Schulten, K. VMD: Visual molecular dynamics. *J.*  
1122 *Mol. Graph.* **14**, 33–38 (1996).
- 1123 93. Wieczór, M., Hospital, A., Bayarri, G., Czub, J. & Orozco, M. Molywood:  
1124 streamlining the design and rendering of molecular movies. *Bioinformatics* **36**,  
1125 4660–4661 (2020).
- 1126 94. Montal, M. & Mueller, P. Formation of Bimolecular Membranes from Lipid  
1127 Monolayers and a Study of Their Electrical Properties. *Proc. Natl. Acad. Sci. U.*  
1128 *S. A.* **69**, 3561 (1972).
- 1129 95. Nikaido, H. & Rosenberg, E. Y. Porin channels in *Escherichia coli*: studies with  
1130 liposomes reconstituted from purified proteins. *J. Bacteriol.* **153**, 241–252  
1131 (1983).
- 1132
